# Supplementary material
Source: PubMed Central journal article supplement (PMC7870529)
Supplement: NIHMS1634931-supplement-1.pdf [file NIHMS1634931-supplement-1.pdf]

Supplementary Table 2: Variants in Known PID Genes

| Proband Number | Age (years) | Sex | Country                 | Consang. | NGS Technology | Gene          | cDNA                     | AA             | Zygoty       | Mutation Type | CADD phred | Variant Classification* |
|----------------|-------------|-----|-------------------------|----------|----------------|---------------|--------------------------|----------------|--------------|---------------|------------|-------------------------|
| 1              | 5           | M   | Egypt                   | Yes      | Panel          | <i>ACPS</i>   | c.800C>A                 | p.Ser267Ter    | homozygous   | nonsense      | .          | Pathogenic              |
| 2              | 0.6         | M   | Algeria                 | Yes      | Panel          | <i>ADA</i>    | c.965T>C                 | p.Phe322Ser    | homozygous   | missense      | 32.0       | VUS                     |
| 3              | 0.3         | F   | Egypt                   | Yes      | Panel          | <i>ADA</i>    | c.956_960delAAGAG        | p.Glu319Glyfs  | homozygous   | nonsense      | .          | Pathogenic              |
| 4              | 0.3         | M   | Egypt                   | Yes      | Panel          | <i>ADA</i>    | c.956_960delAAGAG        | p.Glu319Glyfs  | homozygous   | frameshift    | .          | Pathogenic              |
| 5              | 1           | F   | Egypt                   | Yes      | Panel          | <i>ADA</i>    | c.467G>A                 | p.Arg156His    | homozygous   | missense      | 32.0       | Pathogenic              |
| 6              | 1           | M   | Egypt                   | Yes      | Panel          | <i>ADA</i>    | c.845G>A                 | p.Arg282Gln    | homozygous   | missense      | 33.0       | Pathogenic              |
| 7              | 2           | F   | Egypt                   | Yes      | Panel          | <i>ADA</i>    | c.467G>A                 | p.Arg156His    | homozygous   | missense      | 32.0       | Pathogenic              |
| 8              | 0.3         | M   | Egypt                   | Yes      | Panel          | <i>ADA</i>    | c.466C>T                 | p.Arg156Cys    | homozygous   | missense      | 32.0       | Pathogenic              |
| 9              | 0.3         | M   | Iran                    | Yes      | Panel          | <i>ADA</i>    | c.415G>T                 | p.Glu139Ter    | homozygous   | nonsense      | .          | Pathogenic              |
| 10             | 0.3         | M   | Iran                    | Yes      | Panel          | <i>ADA</i>    | c.704G>A                 | p.Arg235Gln    | homozygous   | missense      | 31.0       | Pathogenic              |
| 11             | 4           | F   | Iran                    | Yes      | Panel          | <i>ADA</i>    | c.845G>A                 | p.Arg282Gln    | homozygous   | missense      | 33.0       | Pathogenic              |
| 12             | 0.3         | M   | Jordan                  | Yes      | Panel          | <i>ADA</i>    | c.956_960delAAGAG        | p.Glu319Glyfs  | homozygous   | frameshift    | .          | Pathogenic              |
| 13             | 0.3         | M   | Lebanon                 | Yes      | Panel          | <i>ADA</i>    | c.996_997del             | p.Ser333Phefs  | homozygous   | frameshift    | .          | Pathogenic              |
| 14             | 0.2         | M   | Pakistan                | Yes      | Panel          | <i>ADA</i>    | c.716G>A                 | p.Gly239Asp    | homozygous   | missense      | 28.2       | Pathogenic              |
| 15             | 12          | M   | Turkey                  | Yes      | Panel          | <i>ADA</i>    | c.385G>A                 | p.Val129Met    | homozygous   | missense      | 27.9       | Pathogenic              |
| 16             | 1           | F   | Iran                    | Yes      | Panel          | <i>ADA</i>    | c.445C>T                 | p.Arg149Trp    | homozygous   | missense      | 28.3       | Pathogenic              |
| 17             | 0.5         | F   | Iran                    | Yes      | Panel          | <i>ADA</i>    | c.821C>T                 | p.Pro274Leu    | homozygous   | missense      | 17.0       | Pathogenic              |
| 18             | 2           | M   | Egypt                   | Yes      | Panel          | <i>ADA2</i>   | c.533T>C                 | p.Phe178Ser    | homozygous   | missense      | 25.9       | Pathogenic              |
| 19             | 1           | M   | Egypt                   | Yes      | Panel          | <i>ADA2</i>   | c.1514T>C                | p.Ile505Thr    | homozygous   | missense      | 22.6       | VUS                     |
| 20             | 17          | F   | Lebanon                 | Yes      | Panel          | <i>ADA2</i>   | c.1271_1277delAGGCTGA    | p.Lys424fs     | homozygous   | frameshift    | .          | Pathogenic              |
| 22             | 16          | F   | Turkey                  | Yes      | Panel          | <i>ADA2</i>   | c.137dupT                | p.Arg49Alafs   | homozygous   | frameshift    | .          | Pathogenic              |
| 23             | 15          | M   | Turkey                  | Yes      | Panel          | <i>ADA2</i>   | c.139G>A                 | p.Gly47Arg     | homozygous   | missense      | 23.6       | Pathogenic              |
| 24             | 14          | M   | Lebanon                 | Yes      | Panel          | <i>ADA2</i>   | c.962G>A                 | p.Gly321Glu    | homozygous   | missense      | 21.5       | Pathogenic              |
| 25             | 4           | M   | Egypt                   | Yes      | Panel          | <i>AICDA</i>  | c.331G>A                 | p.Ala111Thr    | homozygous   | missense      | 25.9       | Pathogenic              |
| 26             | 12          | M   | Iran                    | Yes      | Panel          | <i>AICDA</i>  | c.428-1G>T               | N/A            | homozygous   | splice site   | .          | Pathogenic              |
| 27             | 6           | M   | Iran                    | Yes      | Panel          | <i>AICDA</i>  | c.334C>T                 | p.Arg112Cys    | homozygous   | missense      | 31.0       | Pathogenic              |
| 28             | 3           | F   | Egypt                   | Yes      | Panel          | <i>AIRE</i>   | c.47C>T                  | p.Thr16Met     | homozygous   | missense      | 25.8       | Pathogenic              |
| 29             | 3           | F   | Palestinian Territories | Yes      | Panel          | <i>AIRE</i>   | c.274C>T                 | p.Arg92Trp     | homozygous   | missense      | 25.6       | Pathogenic              |
| 30             | 16          | M   | Lebanon                 | Yes      | WES            | <i>AK2</i>    | c.298G>A                 | p.Gly100Ser    | homozygous   | missense      | 31.0       | Pathogenic              |
| 31             | 0.8         | M   | Lebanon                 | Yes      | Panel          | <i>AK2</i>    | c.298G>A                 | p.Gly100Ser    | homozygous   | missense      | 31.0       | Pathogenic              |
| 32             | 3           | F   | Kazakhstan              | Yes      | Panel          | <i>AP3B1</i>  | c.3158G>A                | p.Gly1053Glu   | homozygous   | missense      | 23.1       | VUS                     |
| 33             | 16          | F   | Turkey                  | Yes      | Panel          | <i>AP3B1</i>  | c.469_472delGAAG         | p.Glu157fs     | homozygous   | frameshift    | .          | Pathogenic              |
| 34             | 1           | F   | Egypt                   | Yes      | WES            | <i>ARPC1B</i> | c.91G>T                  | p.Glu31Ter     | homozygous   | nonsense      | .          | Pathogenic              |
| 35             | 4           | M   | Egypt                   | Yes      | Panel          | <i>ATM</i>    | c.4864G>T                | p.Glu1622Ter   | homozygous   | nonsense      | .          | Pathogenic              |
| 36             | 4           | M   | Egypt                   | Yes      | Panel          | <i>ATM</i>    | c.1235+1G>A              | N/A            | homozygous   | splice site   | .          | Pathogenic              |
| 37             | 5           | F   | Egypt                   | No       | Panel          | <i>ATM</i>    | c.6259_6259delG          | p.Ser2116fs    | compound het | frameshift    | .          | Pathogenic              |
|                |             |     |                         |          |                | <i>ATM</i>    | c.1388C>A                | p.Ala463Glu    |              | missense      | 24.6       | Pathogenic              |
| 38             | 4           | M   | Iran                    | Yes      | Panel          | <i>ATM</i>    | c.3895delG               | p.Ala1299fs    | homozygous   | frameshift    | .          | Pathogenic              |
| 39             | 5           | F   | Lebanon                 | Yes      | Panel          | <i>ATM</i>    | c.8385_8394delTTTCAGTGCC | p.Phe2799fs    | homozygous   | frameshift    | .          | Pathogenic              |
| 40             | 5           | M   | Peru                    | No       | Panel          | <i>ATM</i>    | del entre gene           | del entre gene | homozygous   | deletion      | .          | Pathogenic              |
| 41             | 4           | F   | Qatar                   | Yes      | Panel          | <i>ATM</i>    | c.5243_5244insT          | p.Trp1750fs    | homozygous   | frameshift    | .          | Pathogenic              |
| 42             | 0.7         | M   | Turkey                  | Yes      | Panel          | <i>ATM</i>    | c.67C>T                  | p.Arg23Ter     | homozygous   | nonsense      | .          | Pathogenic              |
| 43             | 4           | F   | United Arab Emirates    | Yes      | Panel          | <i>ATM</i>    | c.3104_3107delTATT       | p.Ile1035fs    | homozygous   | frameshift    | .          | Pathogenic              |
| 44             | 1           | M   | Iran                    | No       | Panel          | <i>BTK</i>    | c.773delA                | p.Asn258Metfs  | hemizygous   | frameshift    | .          | Pathogenic              |
| 45             | 3           | M   | Kazakhstan              | No       | Panel          | <i>BTK</i>    | c.1632-1G>C              | N/A            | hemizygous   | splice site   | .          | Pathogenic              |
| 46             | 13          | M   | Peru                    | No       | Panel          | <i>BTK</i>    | c.894+2dupT              | N/A            | hemizygous   | splice site   | .          | Pathogenic              |
| 47             | 11          | M   | United States           | No       | Panel          | <i>BTK</i>    | c.1684C>T                | p.Arg562Trp    | hemizygous   | missense      | 28.0       | Pathogenic              |
| 48             | 5           | M   | Egypt                   | Yes      | Panel          | <i>BTK</i>    | c.906_908delIAGG         | p.Gly303del    | hemizygous   | frameshift    | .          | Pathogenic              |
| 49             | 11          | M   | Egypt                   | Yes      | Panel          | <i>BTK</i>    | c.82C>T                  | p.Arg28Cys     | hemizygous   | missense      | 28.5       | Pathogenic              |
| 50             | 10          | M   | Egypt                   | Yes      | Panel          | <i>BTK</i>    | c.763C>T                 | p.Arg255Ter    | hemizygous   | nonsense      | .          | Pathogenic              |
| 51             | 1           | M   | Egypt                   | Yes      | Panel          | <i>BTK</i>    | c.494-2A>G               | N/A            | hemizygous   | splice site   | .          | Pathogenic              |
| 52             | 4           | M   | Egypt                   | No       | Panel          | <i>BTK</i>    | c.1085A>T                | p.His362Leu    | hemizygous   | missense      | 28.6       | Pathogenic              |
| 53             | 12          | M   | Iran                    | No       | Panel          | <i>BTK</i>    | c.1631G>T                | p.Arg544Met    | hemizygous   | missense      | 34.0       | Pathogenic              |

|     |     |   |                      |     |       |                |                     |                 |              |                   |      |            |
|-----|-----|---|----------------------|-----|-------|----------------|---------------------|-----------------|--------------|-------------------|------|------------|
| 54  | 15  | M | Iran                 | No  | Panel | <i>BTK</i>     | c.1574G>A           | p.Arg525Gln     | hemizygous   | missense          | 32.0 | Pathogenic |
| 55  | 8   | M | Iran                 | Yes | Panel | <i>BTK</i>     | c.1669-2A>G         | N/A             | hemizygous   | splice site       | .    | Pathogenic |
| 56  | 5   | M | Iran                 | No  | Panel | <i>BTK</i>     | c.1543A>T           | p.Lys515Ter     | hemizygous   | nonsense          | .    | Pathogenic |
| 57  | 3   | M | Iran                 | No  | Panel | <i>BTK</i>     | c.1526T>A           | p.Met509Lys     | hemizygous   | missense          | 27.1 | Pathogenic |
| 58  | 2   | M | Iran                 | No  | Panel | <i>BTK</i>     | c.1522G>A           | p.Ala508Thr     | hemizygous   | missense          | 28.2 | Pathogenic |
| 59  | 6   | M | Iran                 | No  | Panel | <i>BTK</i>     | c.1475delG          | p.Arg492fs      | hemizygous   | frameshift        | .    | Pathogenic |
| 60  | 2   | M | Iran                 | Yes | Panel | <i>BTK</i>     | c.1697C>A           | p.Pro566Gln     | hemizygous   | missense          | 28.3 | Pathogenic |
| 61  | 1   | M | Iran                 | No  | Panel | <i>BTK</i>     | c.1184G>A           | p.Trp395Ter     | hemizygous   | nonsense          | .    | Pathogenic |
| 62  | 1   | M | Iran                 | Yes | Panel | <i>BTK</i>     | c.773delA           | p.Asn258Metfs   | hemizygous   | frameshift        | .    | Pathogenic |
| 63  | 2   | M | Iran                 | No  | Panel | <i>BTK</i>     | c.810delT           | p.Glu271Lysfs   | hemizygous   | frameshift        | .    | Pathogenic |
| 64  | 1   | M | Iran                 | Yes | Panel | <i>BTK</i>     | c.1239T>A           | p.Phe413Leu     | hemizygous   | missense          | 24.3 | Pathogenic |
| 65  | 27  | M | Kuwait               | Yes | Panel | <i>BTK</i>     | del exons 15-16     | del exons 15-16 | hemizygous   | deletion          | .    | Pathogenic |
| 66  | 7   | M | Lebanon              | No  | Panel | <i>BTK</i>     | c.763C>T            | p.Arg255Ter     | hemizygous   | nonsense          | .    | Pathogenic |
| 67  | 7   | M | Pakistan             | Yes | Panel | <i>BTK</i>     | c.240+1G>T          | N/A             | hemizygous   | splice site       | .    | Pathogenic |
| 68  | 1   | M | Turkey               | No  | Panel | <i>BTK</i>     | c.1240G>T           | p.Gly414Trp     | hemizygous   | missense          | 31.0 | Pathogenic |
| 69  | 1   | M | Pakistan             | Yes | WES   | <i>BTK</i>     | c.1883delC          | p.Thr628fs      | hemizygous   | frameshift        | .    | Pathogenic |
| 70  | 10  | M | Egypt                | No  | Panel | <i>BTK</i>     | c.1684C>T           | p.Arg562Trp     | hemizygous   | missense          | 28.0 | Pathogenic |
| 71  | 9   | M | Kazakhstan           | No  | Panel | <i>BTK</i>     | c.83G>A             | p.Arg28His      | hemizygous   | missense          | 28.6 | Pathogenic |
| 72  | 5   | M | Pakistan             | Yes | Panel | <i>C3</i>      | c.1270-1G>T         | N/A             | homozygous   | splice site       | .    | Pathogenic |
| 73  | 1   | F | Algeria              | Yes | Panel | <i>CARD11</i>  | c.1682_1683insC     | p.Met561Ilefs   | homozygous   | frameshift        | .    | Pathogenic |
| 74  | 0.7 | F | Turkey               | Yes | Panel | <i>CARD11</i>  | c.1682_1683insC     | p.Met561fs      | homozygous   | frameshift        | .    | Pathogenic |
| 75  | 9   | M | Italy                | No  | Panel | <i>CARD11</i>  | c.169G>A            | p.Glu57Lys      | heterozygous | missense          | 29.1 | Pathogenic |
| 76  | 4   | F | Turkey               | Yes | Panel | <i>CARD11</i>  | c.1682_1683insC     | p.Met561Ilefs   | homozygous   | frameshift        | .    | Pathogenic |
| 77  | 17  | M | Turkey               | No  | Panel | <i>CARD9</i>   | c.323-1G>A          | N/A             | compound het | splice site       | .    | Pathogenic |
| 78  | 12  | M | Egypt                | Yes | Panel | <i>CARD9</i>   | c.208C>T            | p.Arg70Trp      | homozygous   | missense          | 23.5 | Pathogenic |
| 79  | 0.6 | F | Peru                 | Yes | Panel | <i>CARMIL2</i> | c.865C>T            | p.Gln289Ter     | homozygous   | nonsense          | .    | Pathogenic |
| 80  | 3   | M | Lebanon              | Yes | Panel | <i>CASP8</i>   | c.2509_2510insA     | p.Val839Glyfs   | homozygous   | frameshift        | .    | Pathogenic |
| 81  | 12  | M | Italy                | Yes | Panel | <i>CCBE1</i>   | c.710A>G            | p.Gln237Arg     | homozygous   | missense          | 23.1 | VUS        |
| 82  | 10  | M | Lebanon              | Yes | Panel | <i>CD27</i>    | c.767G>A            | p.Gly256Asp     | homozygous   | missense          | 26.2 | VUS        |
| 83  | 0.3 | M | Iran                 | Yes | Panel | <i>CD27</i>    | c.158G>A            | p.Cys53Tyr      | homozygous   | missense          | 26.4 | Pathogenic |
| 84  | 0.4 | F | Lebanon              | Yes | Panel | <i>CD3D</i>    | c.247G>T            | p.Glu83Ter      | homozygous   | nonsense          | .    | Pathogenic |
| 85  | 0.4 | F | Lebanon              | Yes | Panel | <i>CD3E</i>    | c.173_173delT       | p.Leu58fs       | homozygous   | frameshift        | .    | Pathogenic |
| 86  | 0.9 | M | Lebanon              | Yes | Panel | <i>CD3E</i>    | c.173_173delT       | p.Leu58fs       | homozygous   | frameshift        | .    | Pathogenic |
| 87  | 0.7 | M | Lebanon              | Yes | Panel | <i>CD3E</i>    | c.173delT           | p.Leu58fs       | homozygous   | frameshift        | .    | Pathogenic |
| 88  | 1   | F | Lebanon              | Yes | Panel | <i>CD3E</i>    | c.173delT           | p.Leu58Hisfs    | homozygous   | frameshift        | .    | Pathogenic |
| 89  | 0.5 | F | Greece               | Yes | WES   | <i>CD3E</i>    | c.104-1G>A          | N/A             | homozygous   | splice site       | .    | Pathogenic |
| 90  | 3   | M | Algeria              | No  | Panel | <i>CD3G</i>    | c.18delC            | p.Leu7fs        | homozygous   | frameshift        | .    | Pathogenic |
| 91  | 5   | M | Iran                 | No  | Panel | <i>CD40LG</i>  | c.251G>C            | p.Cys84Ser      | hemizygous   | missense          | 25.3 | Pathogenic |
| 92  | 8   | M | Egypt                | Yes | Panel | <i>CD40LG</i>  | c.346G>T            | p.Gly116Cys     | hemizygous   | missense          | 35.0 | Pathogenic |
| 93  | 3   | M | Iran                 | Yes | Panel | <i>CD40LG</i>  | c.431G>T            | p.Gly144Val     | hemizygous   | missense          | 25.1 | Pathogenic |
| 94  | 3   | M | Iran                 | Yes | Panel | <i>CD40LG</i>  | c.266delG           | p.Ser89fs       | hemizygous   | frameshift        | .    | Pathogenic |
| 95  | 12  | M | Peru                 | No  | Panel | <i>CD40LG</i>  | c.361C>T            | p.Gln121Ter     | hemizygous   | nonsense          | .    | Pathogenic |
| 96  | 0.8 | M | Peru                 | No  | Panel | <i>CD40LG</i>  | c.770G>T            | p.Gly257Val     | hemizygous   | missense          | 26.6 | Pathogenic |
| 97  | 2   | M | Peru                 | No  | Panel | <i>CD40LG</i>  | c.770G>T            | p.Gly257Val     | hemizygous   | missense          | 26.6 | Pathogenic |
| 98  | 1   | M | Greece               | Yes | Panel | <i>CD40LG</i>  | c.334G>T            | p.Glu112Ter     | hemizygous   | nonsense          | .    | Pathogenic |
| 99  | 2   | M | Egypt                | Yes | Panel | <i>CD40LG</i>  | c.208C>T            | p.Gln70Ter      | hemizygous   | nonsense          | .    | Pathogenic |
| 100 | 4   | M | Turkey               | Yes | Panel | <i>CD40LG</i>  | c.761C>T            | p.Thr254Met     | hemizygous   | missense          | 26.3 | Pathogenic |
| 101 | 0.3 | M | Turkey               | No  | Panel | <i>CD40LG</i>  | c.155A>C            | p.Lys52Trp      | hemizygous   | missense          | 29.6 | Pathogenic |
| 102 | 11  | F | United Arab Emirates | Yes | Panel | <i>CD79A</i>   | c.442G>A            | p.Glu148Lys     | homozygous   | missense          | 26.3 | Pathogenic |
| 103 | 0.3 | M | Lebanon              | Yes | Panel | <i>CIITA</i>   | c.1648_1649delCG    | p.Arg550fs      | homozygous   | frameshift        | .    | Pathogenic |
| 104 | 0.5 | M | Egypt                | Yes | Panel | <i>CIITA</i>   | c.3377G>A           | p.Arg1126Gln    | homozygous   | missense          | 26.7 | VUS        |
| 105 | 0.1 | F | Iran                 | Yes | Panel | <i>CIITA</i>   | c.3242_3244delACA   | p.Asn1082del    | homozygous   | in frame deletion | .    | Pathogenic |
| 106 | 13  | F | Egypt                | Yes | Panel | <i>CIITA</i>   | c.1648_1649delCG    | p.Arg550Glyfs   | homozygous   | frameshift        | .    | Pathogenic |
| 107 | 22  | F | Turkey               | Yes | WES   | <i>CORO1A</i>  | 1191_1192insC       | p.Ser401fs      | homozygous   | frameshift        | .    | Pathogenic |
| 108 | 1   | M | Egypt                | Yes | Panel | <i>CR2</i>     | c.3033G>C           | p.Gln1011His    | homozygous   | missense          | 24.3 | Pathogenic |
| 109 | 16  | M | ArgentiN/A           | No  | Panel | <i>CTLA4</i>   | c.76delT            | p.Leu28Phefs    | heterozygous | frameshift        | .    | Pathogenic |
| 109 | 17  | M | United States        | No  | Panel | <i>CTLA4</i>   | c.436_437delGGinsCT | p.Gly146Leu     | heterozygous | missense          | 24.2 | Pathogenic |

|     |     |   |                      |     |       |                                |                                         |                             |              |                      |              |            |
|-----|-----|---|----------------------|-----|-------|--------------------------------|-----------------------------------------|-----------------------------|--------------|----------------------|--------------|------------|
| 110 | 16  | F | United States        | No  | Panel | <i>CTLA4</i>                   | c.347T>A                                | p.Ile116Asn                 | heterozygous | missense             | 26.2         | Pathogenic |
| 111 | 20  | F | Iran                 | No  | Panel | <i>CTLA4</i>                   | del entire gene                         | del entire gene             | heterozygous | deletion             | .            | Pathogenic |
| 112 | 9   | F | Pakistan             | Yes | Panel | <i>CTLA4</i>                   | c.545C>G                                | p.Thr182Arg                 | homozygous   | missense             | 25.8         | VUS        |
| 113 | 2   | M | Greece               | No  | Panel | <i>CXCR4</i>                   | c.157A>C                                | p.Ile53Leu                  | heterozygous | missense             | 22.0         | VUS        |
| 114 | 7   | F | Lebanon              | Yes | Panel | <i>CYBA</i>                    | c.539_539delC                           | p.Pro180fs                  | homozygous   | frameshift           | .            | Pathogenic |
| 115 | 0.8 | M | Pakistan             | Yes | Panel | <i>CYBB</i>                    | c.1222G>A                               | p.Gly408Arg                 | homozygous   | missense             | 26.8         | Pathogenic |
| 116 | 0.3 | F | Egypt                | Yes | Panel | <i>DCLRE1C</i>                 | c.2041_2042insA                         | p.Ala681Aspfs               | homozygous   | nonsense             | .            | Pathogenic |
| 117 | 0.5 | F | Egypt                | Yes | Panel | <i>DCLRE1C</i>                 | c.363-1G>C                              | N/A                         | homozygous   | splice site          | .            | Pathogenic |
| 118 | 0.5 | F | Iran                 | Yes | Panel | <i>DCLRE1C</i>                 | c.632G>T                                | p.Gly211Val                 | homozygous   | missense             | 28.6         | VUS        |
| 119 | 0.3 | M | Iran                 | Yes | Panel | <i>DCLRE1C</i>                 | c.1162G>T                               | p.Glu388Ter                 | homozygous   | nonsense             | .            | Pathogenic |
| 120 | 9   | M | Jordan               | Yes | Panel | <i>DCLRE1C</i>                 | c.1306_1307insAGGATGCT                  | p.Cys436Ter                 | homozygous   | nonsense             | .            | Pathogenic |
| 121 | 1   | F | Jordan               | Yes | Panel | <i>DCLRE1C</i>                 | c.1299_1306dupAGGAT                     | p.Cys436Ter                 | homozygous   | nonsense             | .            | Pathogenic |
| 122 | 0.5 | M | Jordan               | Yes | Panel | <i>DCLRE1C</i>                 | del exons 1-4                           | del exons 1-4               | homozygous   | deletion             | .            | Pathogenic |
| 123 | 0.3 | F | Lebanon              | Yes | Panel | <i>DCLRE1C</i>                 | del exons 1-4                           | del exons 1-4               | homozygous   | deletion             | .            | Pathogenic |
| 124 | 0.3 | F | Pakistan             | Yes | Panel | <i>DCLRE1C</i>                 | del exons 1-14                          | del exons 1-14              | homozygous   | deletion             | .            | Pathogenic |
| 125 | 0.4 | M | Pakistan             | Yes | Panel | <i>DCLRE1C</i>                 | del exons 1-3                           | del exons 1-3               | homozygous   | deletion             | .            | Pathogenic |
| 126 | 1   | F | Turkey               | Yes | Panel | <i>DCLRE1C</i>                 | del exons 1-4                           | del exons 1-4               | homozygous   | deletion             | .            | Pathogenic |
| 127 | 5   | M | Turkey               | No  | Panel | <i>DCLRE1C</i>                 | c.1350_1356delAGATTG                    | p.Asp451fs                  | heterozygous | frameshift           | .            | Pathogenic |
| 128 | 0.6 | F | Egypt                | Yes | WES   | <i>DCLRE1C</i>                 | c.787C>T                                | p.Arg263Ter                 | homozygous   | nonsense             | .            | Pathogenic |
| 129 | 11  | M | Iran                 | Yes | Panel | <i>DCLRE1C</i><br><i>INO80</i> | c.1250_1260delCAATGACTGCA<br>c.3160delG | p.Ser417fs<br>p.Ala1054fs   | homozygous   | frameshift           | .            | Pathogenic |
| 130 | 0.3 | M | Iran                 | Yes | Panel | <i>DCLRE1C</i>                 | del exon 1-4                            | del exon 1-4                | homozygous   | deletion             | .            | Pathogenic |
| 131 | 0.2 | F | Saudi Arabia         | No  | Panel | <i>DCLRE1C</i>                 | del exons 1-3                           | del exons 1-3               | homozygous   | deletion             | .            | Pathogenic |
| 132 | 0.6 | F | United Arab Emirates | Yes | Panel | <i>DCLRE1C</i>                 | c.571C>T                                | p.Arg191Ter                 | homozygous   | nonsense             | .            | Pathogenic |
| 133 | 0.2 | M | Turkey               | Yes | Panel | <i>DCLRE1C</i>                 | del exons 1-4                           | del exons 1-4               | homozygous   | deletion             | .            | Pathogenic |
| 134 | 2   | M | Kuwait               | Yes | WES   | <i>DNMT3B</i>                  | c.2138G>A                               | p.Arg713Gln                 | homozygous   | missense             | 32.0         | Pathogenic |
| 135 | 6   | M | Egypt                | Yes | Panel | <i>DOCK2</i>                   | c.2541delC                              | p.Phe848fs                  | homozygous   | nonsense             | .            | Pathogenic |
| 136 | 0.4 | F | United Arab Emirates | Yes | Panel | <i>DOCK2</i>                   | del exons 28-32                         | del exons 28-32             | homozygous   | deletion             | .            | Pathogenic |
| 137 | 1   | M | Iran                 | Yes | Panel | <i>DOCK8</i>                   | c.3577C>G                               | p.Leu1193Val                | homozygous   | missense             | 25.1         | VUS        |
| 138 | 20  | M | Iran                 | Yes | Panel | <i>DOCK8</i>                   | c.4201G>T                               | p.Glu1401Ter                | heterozygous | nonsense             | .            | Pathogenic |
| 139 | 9   | M | Egypt                | Yes | Panel | <i>DOCK8</i>                   | c.1422G>C<br>c.4346C>T                  | p.Gln474His<br>p.Ser1449Leu | compound het | missense             | 35.0<br>19.7 | VUS<br>VUS |
| 140 | 5   | M | Egypt                | Yes | Panel | <i>DOCK8</i>                   | c.949C>T                                | p.Arg317Ter                 | homozygous   | nonsense             | .            | Pathogenic |
| 141 | 4   | M | Egypt                | Yes | Panel | <i>DOCK8</i>                   | c.3191delA                              | p.Asp1064Valfs              | homozygous   | frameshift           | .            | Pathogenic |
| 142 | 6   | F | Egypt                | Yes | Panel | <i>DOCK8</i>                   | c.3823delA                              | p.Ile1275Ter                | homozygous   | nonsense             | .            | Pathogenic |
| 143 | 11  | F | Egypt                | Yes | Panel | <i>DOCK8</i>                   | del exons 1-4                           | del exons 1-4               | homozygous   | deletion             | .            | Pathogenic |
| 144 | 2   | M | Egypt                | Yes | Panel | <i>DOCK8</i>                   | c.3372_3375delTCCT                      | p.Ser1126fs                 | homozygous   | frameshift           | .            | Pathogenic |
| 145 | 4   | F | Egypt                | Yes | Panel | <i>DOCK8</i>                   | c.663delC                               | p.Phe222fs                  | homozygous   | frameshift           | .            | Pathogenic |
| 146 | 6   | M | Iran                 | Yes | Panel | <i>DOCK8</i>                   | c.5132C>A                               | p.Ser1711Ter                | homozygous   | nonsense             | .            | Pathogenic |
| 147 | 1   | F | Iran                 | Yes | Panel | <i>DOCK8</i>                   | c.4106_4107insG                         | p.Arg1370fs                 | homozygous   | frameshift           | .            | Pathogenic |
| 148 | 9   | M | Lebanon              | Yes | Panel | <i>DOCK8</i>                   | del entire gene                         | del entire gene             | homozygous   | deletion             | .            | Pathogenic |
| 149 | 3   | M | Oman                 | Yes | Panel | <i>DOCK8</i>                   | c.3787delA                              | p.Ile1263Ter                | homozygous   | nonsense             | .            | Pathogenic |
| 150 | 5   | F | Pakistan             | Yes | Panel | <i>DOCK8</i>                   | c.1529_1530delTG                        | p.Leu510Argfs               | homozygous   | frameshift           | .            | Pathogenic |
| 151 | 0.3 | F | Turkey               | Yes | Panel | <i>DOCK8</i>                   | del exons 1-26                          | del exons 1-26              | homozygous   | deletion             | .            | Pathogenic |
| 152 | 3   | M | Saudi Arabia         | Yes | WES   | <i>DOCK8</i>                   | c.1517-1G>C                             | N/A                         | homozygous   | splice site          | .            | Pathogenic |
| 153 | 6   | M | Lebanon              | Yes | Panel | <i>DOCK8</i>                   | c.3130C>T                               | p.Gln1044Ter                | homozygous   | nonsense             | .            | Pathogenic |
| 154 | 6   | M | Iran                 | No  | Panel | <i>DOCK8</i>                   | del exons 1,27 and 28                   | del exons 1,27 and 28       | homozygous   | deletion             | .            | Pathogenic |
| 155 | 5   | F | Turkey               | Yes | Panel | <i>DOCK8</i>                   | del exons 1-26                          | del exons 1-26              | homozygous   | deletion             | .            | Pathogenic |
| 156 | 7   | F | United Arab Emirates | Yes | Panel | <i>DOCK8</i>                   | del exon 11                             | del exon 11                 | homozygous   | deletion             | .            | Pathogenic |
| 157 | 1   | M | Egypt                | Yes | Panel | <i>DOCK8</i>                   | c.1517-1G>C                             | N/A                         | homozygous   | splice site          | .            | Pathogenic |
| 158 | 2   | M | Iran                 | Yes | Panel | <i>DOCK8</i>                   | del exons 9-12                          | del exons 9-12              | homozygous   | deletion             | .            | Pathogenic |
| 159 | 1   | F | Jordan               | Yes | Panel | <i>DOCK8</i>                   | del exons 1-2                           | del exons 1-2               | homozygous   | deletion             | .            | Pathogenic |
| 160 | 7   | M | Egypt                | Yes | Panel | <i>DOCK8</i>                   | c.4826_4827 delAC                       | p.Thr1610fs                 | homozygous   | frameshift           | .            | Pathogenic |
| 161 | 1   | M | Lebanon              | No  | Panel | <i>ELANE</i>                   | c.416C>T                                | p.Pro139Leu                 | Heterozygous | missense             | 23.9         | Pathogenic |
| 162 | 1   | F | Egypt                | No  | Panel | <i>EPG5</i><br><i>EPG5</i>     | c.3976C>T<br>c.1261C>T                  | p.Gln1326Ter<br>p.Gln421Ter | compound het | nonsense<br>nonsense | .            | Pathogenic |
| 163 | 3   | M | Algeria              | Yes | Panel | <i>FAS</i>                     | c.397T>G                                | p.Phe133Val                 | homozygous   | missense             | 23.8         | VUS        |

|       |     |   |                      |     |             |           |                     |               |              |             |      |            |
|-------|-----|---|----------------------|-----|-------------|-----------|---------------------|---------------|--------------|-------------|------|------------|
| 164   | 14  | M | United States        | No  | Panel       | FAS       | c.185C>G            | p.Pro62Arg    | heterozygous | missense    | 13.2 | VUS        |
| 165   | 0.3 | F | Pakistan             | Yes | Panel       | FERMT3    | c.126delC           | p.Gln367fs    | homozygous   | frameshift  | .    | Pathogenic |
| 166   | 3   | F | United Arab Emirates | Yes | Panel       | FERMT3    | c.48G>A             | p.Trp16Ter    | homozygous   | nonsense    | .    | Pathogenic |
| 167   | 0.2 | F | Lebanon              | Yes | WES         | FOXP1     | c.562delA           | p.S188fs      | homozygous   | frameshift  | .    | Pathogenic |
| 168   | 5   | M | Egypt                | Yes | Panel       | FOXP3     | c.1190G>A           | p.Arg397Gln   | heterozygous | missense    | 32.0 | Pathogenic |
| 169   | 0.3 | M | Lebanon              | No  | Panel       | FOXP3     | c.1150G>A           | p.Ala384Thr   | hemizygous   | missense    | 25.0 | Pathogenic |
| 170   | 4   | F | Lebanon              | No  | Panel       | GATA2     | c.1243G>A           | p.Glu415Lys   | heterozygous | missense    | 23.2 | Pathogenic |
| 171   | 21  | M | United States        | No  | WES         | GATA2     | c.1061C>T           | p.Thr354Met   | heterozygous | missense    | 31.0 | Pathogenic |
| 172   | 56  | F | Chile                | No  | Panel       | GATA2     | c.942_943insCTGT    | p.Cys316Serfs | heterozygous | frameshift  | .    | Pathogenic |
| 173   | 2   | F | Oman                 | Yes | Panel       | GATA2     | del exons 1-3       | del exons 1-3 | homozygous   | deletion    | .    | Pathogenic |
| 174   | 20  | F | United States        | No  | Panel       | GATA2     | c.1109G>C           | p.Cys370Ser   | heterozygous | missense    | 29.5 | Pathogenic |
| 175   | 7   | F | Egypt                | Yes | Panel       | HAX1      | c.355delC           | p.Leu119fs    | homozygous   | frameshift  | .    | Pathogenic |
| 176   | 2   | F | Iran                 | Yes | Panel       | HAX1      | c.130_131insA       | p.Trp44Ter    | homozygous   | nonsense    | .    | Pathogenic |
| 177   | 6   | M | Lebanon              | Yes | Panel       | HAX1      | c.130_131insT       | p.Trp44fs     | homozygous   | frameshift  | .    | Pathogenic |
| 178   | 0.7 | M | Iran                 | Yes | Panel + WES | HYOU1     | c.1331C>A           | p.Pro444His   | homozygous   | missense    | 29.8 | VUS        |
| 179   | 0.1 | M | Kuwait               | Yes | WES         | ICOS      | c.90delG            | p.M30fs       | homozygous   | frameshift  | .    | Pathogenic |
| 180   | 1   | F | Jordan               | No  | Panel       | IFNGR1    | c.817_820delATTA    | p.Asn274Hisfs | heterozygous | frameshift  | .    | Pathogenic |
| 181   | 3   | M | Peru                 | No  | Panel       | IFNGR1    | c.816_822delAATTAAT | p.Asn274Hisfs | heterozygous | frameshift  | .    | Pathogenic |
| 182   | 12  | F | Egypt                | Yes | Panel       | IFNGR1    | c.589G>A            | p.Glu197Lys   | heterozygous | missense    | 33.0 | Pathogenic |
| 183   | 1   | F | Saudi Arabia         | Yes | Panel       | IFNGR2    | c.537C>A            | p.Tyr179Ter   | homozygous   | nonsense    | .    | Pathogenic |
| 184** | 0.3 | M | Saudi Arabia         | Yes | WES         | IFNGR2    | c.798delT           | p.Cys266fs    | homozygous   | frameshift  | .    | Pathogenic |
| 185   | 3   | M | Turkey               | Yes | Panel       | IGHM      | del exons 1-4       | del exons 1-4 | homozygous   | deletion    | .    | Pathogenic |
| 186   | 5   | F | Turkey               | Yes | Panel       | IGHM      | del exons 1-4       | del exons 1-4 | homozygous   | deletion    | .    | Pathogenic |
| 187   | 12  | F | Argentina/A          | Yes | Panel       | IGLL1     | c.258delG           | p.Gln88Asnfs  | homozygous   | frameshift  | .    | Pathogenic |
| 188   | 0.6 | M | Egypt                | Yes | Panel       | TNFRSF13B | c.62-2A>G           | N/A           | homozygous   | splice site | .    | Pathogenic |
| 189   | 1   | M | Egypt                | Yes | Panel       | IKBK      | del exon 9          | del exon 9    | homozygous   | deletion    | .    | Pathogenic |
| 190   | 28  | M | Turkey               | No  | Panel       | IKZF1     | c.500A>G            | p.His167Arg   | heterozygous | missense    | 25.9 | Pathogenic |
| 191   | 0.9 | M | Egypt                | Yes | Panel       | IL10RA    | c.499T>C            | p.Tyr167His   | homozygous   | missense    | 25.2 | VUS        |
| 192   | 0.8 | M | Iran                 | Yes | Panel       | IL10RB    | c.92C>T             | p.Ser31Phe    | homozygous   | missense    | 29.9 | VUS        |
| 193   | 0.9 | F | Turkey               | Yes | Panel       | IL10RB    | del exons 3-7       | del exons 3-7 | homozygous   | deletion    | .    | Pathogenic |
| 194   | 4   | M | Iran                 | Yes | Panel       | IL12B     | c.527_528delCT      | p.Ser176Cysfs | homozygous   | nonsense    | .    | Pathogenic |
| 195   | 1   | M | Iran                 | Yes | Panel       | IL12B     | c.527_528delCT      | p.Ser176Cysfs | homozygous   | nonsense    | .    | Pathogenic |
| 196   | 5   | M | Egypt                | Yes | Panel       | IL12B     | c.191delA           | p.Gln64fs     | homozygous   | frameshift  | .    | Pathogenic |
| 197   | 3   | M | Iran                 | Yes | Panel       | IL12B1    | c.684_685insT       | p.Val229fs    | homozygous   | frameshift  | .    | Pathogenic |
| 198   | 7   | F | Algeria              | No  | Panel       | IL12RB1   | c.1791+2T>G         | N/A           | compound het | splice site | .    | Pathogenic |
| 199   | 6   | F | Algeria              | Yes | Panel       | IL12RB1   | c.637C>T            | p.Arg213Trp   | homozygous   | missense    | 18.3 | Pathogenic |
| 200   | 2   | F | Egypt                | Yes | Panel       | IL12RB1   | c.1386_1387delGT    | p.Ser463fs    | homozygous   | frameshift  | .    | Pathogenic |
| 201   | 3   | F | Egypt                | Yes | Panel       | IL12RB1   | c.184+2T>G          | N/A           | homozygous   | splice site | .    | Pathogenic |
| 202   | 0.5 | F | Iran                 | Yes | Panel       | IL12RB1   | c.1911+2T>G         | N/A           | homozygous   | splice site | .    | Pathogenic |
| 203   | 0.5 | F | Iran                 | Yes | Panel       | IL12RB1   | c.509T>A            | p.Val170Glu   | homozygous   | missense    | 16.0 | VUS        |
| 204   | 2   | M | Iran                 | Yes | Panel       | IL12RB1   | c.440_441delTG      | p.Val147Alafs | homozygous   | frameshift  | .    | Pathogenic |
| 205   | 13  | F | Oman                 | Yes | Panel       | IL12RB1   | c.804_805insT       | p.Val269fs    | homozygous   | frameshift  | .    | Pathogenic |
| 206   | 13  | F | Peru                 | Yes | Panel       | IL12RB1   | c.1911+2T>G         | N/A           | homozygous   | splice site | .    | Pathogenic |
| 207   | 3   | M | Turkey               | Yes | Panel       | IL12RB1   | c.684_685insT       | p.Val229fs    | homozygous   | frameshift  | .    | Pathogenic |
| 208   | 0.8 | F | Iran                 | Yes | Panel       | IL17RA    | c.1867delC          | p.Leu623fs    | homozygous   | frameshift  | .    | Pathogenic |
| 209   | 1   | M | Egypt                | Yes | Panel       | IL1RN     | c.160C>T            | p.Gln54Ter    | homozygous   | nonsense    | .    | Pathogenic |
| 210   | 2   | M | Egypt                | Yes | Panel       | IL1RN     | c.169C>T            | p.Gln57Ter    | homozygous   | nonsense    | .    | Pathogenic |
| 210   | 1   | M | Peru                 | No  | Panel       | IL2RG     | c.738G>A            | p.Trp246Ter   | homozygous   | nonsense    | .    | Pathogenic |
| 211   | 0.5 | M | Jordan               | No  | Panel       | IL2RG     | c.811G>C            | p.Gly271Arg   | hemizygous   | missense    | 22.8 | Pathogenic |
| 212   | 0.4 | M | United States        | No  | Panel       | IL2RG     | c.703C>T            | p.Gln235Ter   | hemizygous   | nonsense    | .    | Pathogenic |
| 213   | 0.7 | M | Egypt                | Yes | Panel       | IL2RG     | c.436C>G            | p.Leu146Val   | hemizygous   | missense    | 22.0 | VUS        |
| 214   | 2   | M | Egypt                | Yes | Panel       | IL2RG     | c.670C>T            | p.Arg224Trp   | hemizygous   | missense    | 32.0 | Pathogenic |
| 215   | 0.7 | M | Egypt                | Yes | Panel       | IL2RG     | c.676C>T            | p.Arg226Cys   | hemizygous   | missense    | 29.2 | Pathogenic |
| 216   | 0.8 | M | Egypt                | Yes | Panel       | IL2RG     | c.670C>T            | p.Arg224Trp   | hemizygous   | missense    | 32.0 | Pathogenic |
| 217   | 0.3 | M | Iran                 | Yes | Panel       | IL2RG     | c.850G>T            | p.Glu284Ter   | hemizygous   | nonsense    | .    | Pathogenic |
| 218   | 0.3 | M | Iran                 | Yes | Panel       | IL2RG     | c.181_182delCA      | p.Gln61fs     | hemizygous   | frameshift  | .    | Pathogenic |

|     |     |   |                      |     |             |                |                            |                |              |                            |      |            |
|-----|-----|---|----------------------|-----|-------------|----------------|----------------------------|----------------|--------------|----------------------------|------|------------|
| 219 | 0.7 | M | Lebanon              | Yes | Panel       | <i>IL2RG</i>   | c.437T>C                   | p.Leu146Pro    | hemizygous   | missense                   | 23.5 | VUS        |
| 220 | 0.7 | M | Lebanon              | No  | Panel       | <i>IL2RG</i>   | c.982C>T                   | p.Arg328Ter    | hemizygous   | nonsense                   | .    | Pathogenic |
| 221 | 0.7 | M | Egypt                | No  | Panel       | <i>IL2RG</i>   | c.758-1G>C                 | N/A            | hemizygous   | splice site                | .    | Pathogenic |
| 222 | 0.4 | F | Chile                | No  | Panel       | <i>IL7R</i>    | c.83-2A>T                  | N/A            | heterozygous | splice site                | .    | Pathogenic |
| 223 | 1   | M | Egypt                | Yes | Panel       | <i>IL7R</i>    | del exon 1                 | del exon 1     | homozygous   | deletion                   | .    | Pathogenic |
| 224 | 0.3 | M | Pakistan             | Yes | Panel       | <i>IL7R</i>    | c.83-1G>T                  | N/A            | homozygous   | splice site                | .    | Pathogenic |
| 225 | 0.3 | M | Turkey               | Yes | Panel       | <i>IL7R</i>    | c.696dupT                  | p.Asn233Ter    | homozygous   | nonsense                   | .    | Pathogenic |
| 226 | 6   | M | Egypt                | Yes | Panel       | <i>INO80</i>   | c.2374A>T                  | p.Met792Leu    | homozygous   | missense                   | 21.5 | VUS        |
| 227 | 5   | M | Tunisia              | Yes | Panel       | <i>IRAK4</i>   | c.609_622delCTACGTAAATAACA | p.Tyr204Asnfs  | homozygous   | frameshift                 | .    | Pathogenic |
| 228 | 5   | M | United States        | No  | Panel       | <i>IRAK4</i>   | c.88G>T                    | p.Glu30Ter     | compound het | nonsense                   | .    | Pathogenic |
|     |     |   |                      |     |             | <i>IRAK4</i>   | c.877C>T                   | p.Gln293Ter    |              | nonsense                   | .    | Pathogenic |
| 229 | 0.7 | F | Kuwait               | Yes | Panel       | <i>ITGB2</i>   | c.821dupA                  | p.Leu275Alafs  | homozygous   | frameshift                 | .    | Pathogenic |
| 230 | 0.3 | F | Egypt                | Yes | Panel       | <i>ITGB2</i>   | c.850G>A                   | p.Gly284Ser    | homozygous   | missense                   | 25.7 | Pathogenic |
|     |     |   |                      |     |             | <i>ITGB2</i>   | c.821_822insA              | p.Leu275fs     | homozygous   | frameshift                 | .    | Pathogenic |
| 231 | 1   | M | Egypt                | Yes | Panel       | <i>ITGB2</i>   | c.59-1G>A                  | N/A            | homozygous   | splice site                | .    | Pathogenic |
| 232 | 0.2 | F | Pakistan             | Yes | Panel       | <i>ITGB2</i>   | c.134G>A                   | p.Trp45Ter     | homozygous   | nonsense                   | .    | Pathogenic |
| 233 | 10  | M | Egypt                | Yes | Panel       | <i>ITK</i>     | c.236C>T                   | p.Pro79Leu     | homozygous   | missense                   | 27.3 | Pathogenic |
| 234 | 8   | F | Iran                 | Yes | Panel       | <i>ITK</i>     | c.1061-1G>C                | N/A            | homozygous   | splice site                | .    | Pathogenic |
| 235 | 13  | F | Lebanon              | Yes | Panel       | <i>ITK</i>     | c.1562C>T                  | p.Pro521Leu    | homozygous   | missense                   | 29.6 | VUS        |
| 236 | 7   | M | Peru                 | No  | Panel       | <i>JAGN1</i>   | c.3G>A                     | p.Met11Ile     | compound het | missense (alt start codon) | 31.0 | Pathogenic |
|     |     |   |                      |     |             | <i>JAGN1</i>   | c.27delG                   | p.Ala10fs      |              | frameshift                 | .    | Pathogenic |
| 237 | 1   | M | Lebanon              | No  | Panel       | <i>JAK3</i>    | c.1744C>T                  | p.Arg582Trp    | heterozygous | missense                   | 27.5 | Pathogenic |
| 238 | 1   | F | Lebanon              | Yes | Panel       | <i>JAK3</i>    | c.2351-14T>G               | N/A            | homozygous   | splice site                | .    | VUS        |
| 239 | 7   | F | Egypt                | Yes | Panel       | <i>JAK3</i>    | c.2492G>T                  | p.Gly831Val    | homozygous   | missense                   | 32.0 | VUS        |
| 240 | 0.4 | F | Iran                 | Yes | Panel       | <i>JAK3</i>    | c.2125T>A                  | p.Trp709Arg    | homozygous   | missense                   | 27.7 | Pathogenic |
| 241 | 0.7 | F | Jordan               | Yes | Panel       | <i>JAK3</i>    | c.1766G>T                  | p.Gly589Val    | homozygous   | missense                   | 26.3 | Pathogenic |
| 242 | 0.8 | M | Pakistan             | Yes | Panel       | <i>JAK3</i>    | del exon 10                | del exon 10    | homozygous   | deletion                   | .    | Pathogenic |
| 243 | 0.7 | M | Qatar                | Yes | Panel       | <i>JAK3</i>    | c.1900G>C                  | p.Ala634Pro    | homozygous   | missense                   | 29.6 | Pathogenic |
| 244 | 0.9 | F | United Arab Emirates | Yes | Panel       | <i>JAK3</i>    | c.172G>A                   | p.Ala58Thr     | homozygous   | missense                   | 27.7 | VUS        |
| 245 | 0.1 | F | United States        | Yes | WES         | <i>JAK3</i>    | c.602T>C                   | p.Leu201Pro    | homozygous   | missense                   | 22.0 | VUS        |
| 246 | 8   | F | United States        | No  | WES         | <i>KMT2D</i>   | c.16267G>T                 | p.Val5423Phe   | heterozygous | missense                   | 28.8 | VUS        |
| 247 | 0.4 | M | United Arab Emirates | Yes | Panel       | <i>LIG1</i>    | c.2014C>T                  | p.Arg672Cys    | homozygous   | missense                   | 31.0 | Pathogenic |
|     |     |   |                      |     |             | <i>SP110</i>   | c.691C>T                   | p.Gln231Ter    | homozygous   | nonsense                   | .    | Pathogenic |
| 248 | 10  | M | Peru                 | No  | Panel       | <i>LRBA</i>    | del exon 5-6               | del exon 5-6   | homozygous   | deletion                   | .    | Pathogenic |
| 249 | 13  | F | Algeria              | Yes | Panel       | <i>LRBA</i>    | c.7408C>T                  | p.Gln2470Ter   | homozygous   | nonsense                   | .    | Pathogenic |
| 250 | 16  | F | ArgentiN/A           | Yes | Panel       | <i>LRBA</i>    | c.2735_2738delGGGT         | p.Trp912Ter    | homozygous   | nonsense                   | .    | Pathogenic |
| 251 | 5   | M | Egypt                | Yes | Panel       | <i>LRBA</i>    | c.491dupT                  | p.Leu164fs     | homozygous   | frameshift                 | .    | Pathogenic |
| 252 | 6   | M | Egypt                | Yes | Panel       | <i>LRBA</i>    | c.6587delG                 | p.Arg2196Leufs | homozygous   | frameshift                 | .    | Pathogenic |
| 253 | 11  | F | Egypt                | Yes | Panel       | <i>LRBA</i>    | c.534delA                  | p.Asp1791Ilefs | homozygous   | frameshift                 | .    | Pathogenic |
| 254 | 7   | M | Egypt                | Yes | Panel       | <i>LRBA</i>    | c.8335_8336delGA           | p.Asp2779Ter   | homozygous   | nonsense                   | .    | Pathogenic |
| 255 | 5   | M | Egypt                | Yes | Panel       | <i>LRBA</i>    | c.3229G>T                  | p.Glu1077Ter   | homozygous   | nonsense                   | .    | Pathogenic |
| 256 | 6   | M | Egypt                | Yes | Panel       | <i>LRBA</i>    | del exons 1-22             | del exons 1-22 | homozygous   | deletion                   | .    | Pathogenic |
| 257 | 4   | M | Egypt                | Yes | Panel       | <i>LRBA</i>    | c.2368-2A>G                | N/A            | homozygous   | splice site                | .    | Pathogenic |
| 258 | 13  | F | Peru                 | Yes | Panel       | <i>LRBA</i>    | c.949C>T                   | p.Arg317Ter    | homozygous   | nonsense                   | .    | Pathogenic |
| 259 | 13  | M | Lebanon              | Yes | WES         | <i>LRBA</i>    | c.865_866del               | p.Cys289fs     | homozygous   | nonsense                   | .    | Pathogenic |
| 260 | 8   | F | Egypt                | Yes | Panel       | <i>LRBA</i>    | c.6415C>T                  | p.Arg2139Ter   | homozygous   | nonsense                   | .    | Pathogenic |
| 261 | 6   | M | Egypt                | Yes | Panel       | <i>LRBA</i>    | c.3229G>T                  | p.Glu1077Ter   | homozygous   | nonsense                   | .    | Pathogenic |
| 262 | 6   | F | Egypt                | Yes | Panel       | <i>LRBA</i>    | c.8335_8336delGA           | p.Asp2779Ter   | homozygous   | nonsense                   | .    | Pathogenic |
| 263 | 0.3 | M | Saudi Arabia         | Yes | WES         | <i>LRBA</i>    | c.2032C>T                  | p.Gln678Ter    | homozygous   | nonsense                   | .    | Pathogenic |
| 264 | 1   | M | Kuwait               | Yes | WES         | <i>LRBA</i>    | dup exons 49-53            | N/A            | homozygous   | duplication                | .    | Pathogenic |
| 265 | 4   | F | Saudi Arabia         | Yes | Panel       | <i>MALT1</i>   | del exon 11                | del exon 11    | homozygous   | deletion                   | .    | Pathogenic |
| 266 | 0.8 | M | Oman                 | Yes | Panel + WES | <i>MAP3K14</i> | c.1693C>T                  | p.Arg565Trp    | homozygous   | missense                   | 19.3 | VUS        |
| 267 | 10  | F | Egypt                | No  | Panel       | <i>MEFV</i>    | c.2177T>C                  | p.Val726Ala    | compound het | missense                   | 0.0  | VUS        |
|     |     |   |                      |     |             | <i>MEFV</i>    | c.2076_2078delAAT          | p.Ile692del    |              | frameshift                 | .    | Pathogenic |
| 268 | 6   | F | Egypt                | Yes | Panel       | <i>MEFV</i>    | c.2076_2078delAAT          | p.Ile692del    | heterozygous | nonsense                   | .    | Pathogenic |
| 269 | 2   | M | Lebanon              | Yes | WES         | <i>MEFV</i>    | c.2080A>G                  | p.Met694Val    | homozygous   | missense                   | 10.6 | Pathogenic |
| 270 | 1   | M | Egypt                | Yes | Panel       | <i>MRE11A</i>  | c.1105T>C                  | p.Tyr369His    | homozygous   | missense                   | 24.7 | VUS        |

|     |     |   |                         |     |             |                       |                          |                    |              |             |      |            |
|-----|-----|---|-------------------------|-----|-------------|-----------------------|--------------------------|--------------------|--------------|-------------|------|------------|
| 271 | 0.4 | M | Greece                  | Yes | Panel       | <i>MRE11A</i>         | c.318delT                | p.Pro107fs         | homozygous   | frameshift  | .    | Pathogenic |
| 272 | 12  | M | Egypt                   | Yes | Panel       | <i>MSH6</i>           | c.453dupT                | p.Thr152Yrfs       | homozygous   | frameshift  | .    | Pathogenic |
| 273 | 1   | M | Egypt                   | Yes | Panel       | <i>MVK</i>            | c.976G>A                 | p.Gly326Arg        | homozygous   | missense    | 24.8 | Pathogenic |
| 274 | 14  | F | Turkey                  | No  | Panel       | <i>MVK</i>            | c.52G>A                  | p.Gly18Arg         | compound het | missense    | 31.0 | Pathogenic |
|     |     |   |                         |     |             | <i>MVK</i>            | c.1129G>A                | p.Val377Ile        |              | missense    | 14.4 | Pathogenic |
| 275 | 0.3 | F | Egypt                   | Yes | WES         | <i>MVK</i>            | c.C1162T                 | p.Arg388Ter        | homozygous   | nonsense    | .    | Pathogenic |
| 276 | 15  | M | Palestinian Territories | No  | Panel       | <i>MVK</i>            | c.412delC                | p.Ala141fs         | heterozygous | frameshift  | .    | Pathogenic |
| 277 | 0.8 | M | Oman                    | Yes | Panel       | <i>MYD88</i>          | c.814C>T                 | p.Arg272Ter        | homozygous   | nonsense    | .    | Pathogenic |
| 278 | 0.3 | M | Egypt                   | Yes | WES         | <i>MYO5B</i>          | c.1966C>T                | p.Arg656Cys        | homozygous   | missense    | 29.8 | Pathogenic |
| 279 | 18  | M | Turkey                  | Yes | WES         | <i>MYSM1</i>          | c.103_109del             | p.Asp35Ilefs       | homozygous   | frameshift  | .    | Pathogenic |
| 280 | 0.8 | M | Kuwait                  | Yes | WES         | <i>NBEAL2</i>         | c.3908_3909insT          | p.P1303fs          | homozygous   | frameshift  | .    | Pathogenic |
| 281 | 1   | M | Kuwait                  | Yes | Panel       | <i>NBN</i>            | c.900_924del             | p.Gly301fs         | homozygous   | frameshift  | .    | Pathogenic |
| 282 | 5   | M | Egypt                   | Yes | Panel       | <i>NCF1</i>           | del exon 10              | del exon 10        | homozygous   | deletion    | .    | Pathogenic |
| 283 | 3   | M | Pakistan                | Yes | Panel       | <i>NCF1</i>           | c.124C>T                 | p.Arg42Trp         | homozygous   | missense    | 25.5 | Pathogenic |
| 284 | 2   | M | Pakistan                | Yes | Panel       | <i>NCF1</i>           | del exons 2 and 10       | del exons 2 and 10 | homozygous   | deletion    | .    | Pathogenic |
| 285 | 0.1 | M | Pakistan                | Yes | Panel       | <i>NCF1</i>           | c.294_295insA            | p.Gly99fs          | homozygous   | frameshift  | .    | Pathogenic |
| 286 | 1   | F | Pakistan                | Yes | Panel       | <i>NCF2</i>           | c.1098_1099delTC         | p.Gln367fs         | homozygous   | frameshift  | .    | Pathogenic |
| 287 | 12  | F | Peru                    | No  | Panel       | <i>NCF2</i>           | del exons 1-2            | del exons 1-2      | homozygous   | deletion    | .    | Pathogenic |
| 288 | 8   | F | Kuwait                  | Yes | WES         | <i>NCF2</i>           | c.865+1G>A               | N/A                | homozygous   | splice site | .    | Pathogenic |
| 289 | 7   | M | Iran                    | No  | Panel       | <i>NFKB2</i>          | c.455delA                | p.Lys153Asnfs      | heterozygous | frameshift  | .    | Pathogenic |
| 290 | 20  | F | United States           | No  | Panel       | <i>NFKB2</i>          | c.2600C>T                | p.Ala867Val        | heterozygous | missense    | 25.6 | Pathogenic |
| 291 | 14  | F | India                   | No  | Panel       | <i>NFKB2</i>          | c.1588delC               | p.Leu531Cysfs      | heterozygous | frameshift  | .    | Pathogenic |
| 292 | 40  | M | Italy                   | No  | Panel       | <i>NFKB2</i>          | c.2557C>T                | p.Arg853Ter        | heterozygous | nonsense    | .    | Pathogenic |
| 293 | 12  | F | Kuwait                  | No  | Panel       | <i>NFKB2</i>          | c.2596_2597delAG         | p.Ser866fs         | heterozygous | frameshift  | .    | Pathogenic |
| 294 | 15  | M | Egypt                   | Yes | Panel       | <i>NFKB2</i>          | c.2557C>T                | p.Arg853Ter        | heterozygous | nonsense    | .    | Pathogenic |
| 295 | 15  | F | Egypt                   | Yes | Panel       | <i>NFKB2</i>          | c.2557C>T                | p.Arg853Ter        | heterozygous | nonsense    | .    | Pathogenic |
| 296 | 7   | M | Egypt                   | Yes | Panel       | <i>NHEJ1</i>          | c.532C>T                 | p.Arg178Ter        | homozygous   | nonsense    | .    | Pathogenic |
| 297 | 2   | F | Iran                    | Yes | Panel       | <i>NHEJ1</i>          | c.526C>T                 | p.Arg176Ter        | homozygous   | nonsense    | .    | Pathogenic |
| 298 | 2   | M | Egypt                   | No  | Panel       | <i>NLRCA</i>          | c.1540C>T                | p.Gln514Ter        | heterozygous | nonsense    | .    | Pathogenic |
| 299 | 6   | M | ArgentiN/A              | No  | Panel       | <i>NLRP12</i>         | c.3068T>C                | p.Leu1023Pro       | heterozygous | missense    | 23.1 | VUS        |
| 300 | 13  | M | United States           | Yes | Panel       | <i>NLRP12</i>         | c.753C>G                 | p.Asn251Lys        | homozygous   | missense    | 22.8 | VUS        |
| 301 | 2   | M | Egypt                   | No  | Panel       | <i>NLRP3</i>          | c.932T>C                 | p.Phe311Ser        | heterozygous | missense    | 22.8 | VUS        |
| 302 | 2   | M | Lebanon                 | No  | Panel       | <i>NOD2</i>           | c.1070A>C                | p.Asp357Ala        | heterozygous | missense    | 22.1 | Pathogenic |
| 303 | 3   | F | ArgentiN/A              | No  | Panel       | <i>NRAS</i>           | c.35G>C                  | p.Gly12Ala         | heterozygous | missense    | 27.3 | Pathogenic |
| 304 | 0.3 | M | United Arab Emirates    | Yes | WES         | <i>ORAI1</i>          | c.493_494insC            | p.His165Profs      | homozygous   | frameshift  | .    | Pathogenic |
| 305 | 0.6 | F | Oman                    | Yes | WES         | <i>ORAI1</i>          | c.808C>T                 | p.Arg270Ter        | homozygous   | nonsense    | .    | Pathogenic |
| 306 | 3   | F | Turkey                  | Yes | Panel + WES | <i>PEPD</i>           | c.611_623dupAGGCCACCGTGA | p.Val209Glyfs      | homozygous   | frameshift  | .    | Pathogenic |
| 307 | 1   | M | Egypt                   | Yes | Panel       | <i>PGM3</i>           | c.975T>G                 | p.Asp325Glu        | homozygous   | missense    | 23.1 | Pathogenic |
| 308 | 3   | M | Egypt                   | No  | Panel       | <i>PGM3</i>           | c.1139G>C                | p.Gly380Ala        | compound het | missense    | 25.1 | VUS        |
|     |     |   |                         |     |             | <i>PGM3</i>           | c.545A>G                 | p.Tyr182Cys        |              | missense    | 27.3 | VUS        |
| 309 |     | M | Lebanon                 | No  | Panel       | <i>PIK3CD (GOF)</i>   | c.3061G>A                | p.Glu1021Lys       | heterozygous | missense    | 24.7 | Pathogenic |
| 310 | 10  | M | Lebanon                 | No  | Panel       | <i>PIK3CD (GOF)</i>   | c.3061G>A                | p.Glu1021Lys       | heterozygous | missense    | 24.7 | Pathogenic |
|     |     |   |                         |     |             | <i>WRAP53</i>         | c.1565delC               | p.Ala522Glyfs*26   | homozygous   | frameshift  | .    | Pathogenic |
| 311 | 4   | F | Algeria                 | No  | Panel       | <i>PIK3CD (GOF)</i>   | c.371G>A                 | p.Gly124Asp        | heterozygous | missense    | 25.9 | Pathogenic |
| 312 | 9   | F | Argentina               | No  | Panel       | <i>PIK3CD (GOF)</i>   | c.3061G>A                | p.Glu1021Lys       | heterozygous | missense    | 24.7 | Pathogenic |
| 313 | 3   | F | Chile                   | No  | Panel       | <i>PIK3CD (GOF)</i>   | c.1002C>G                | p.Asn334Lys        | heterozygous | missense    | 21.5 | Pathogenic |
| 314 | 4   | F | Peru                    | No  | Panel       | <i>PIK3CD (GOF)</i>   | c.3061G>A                | p.Glu1021Lys       | heterozygous | missense    | 24.7 | Pathogenic |
| 315 | 3   | F | Peru                    | No  | Panel       | <i>PIK3CD (GOF)</i>   | c.3061G>A                | p.Glu1021Lys       | heterozygous | missense    | 24.7 | Pathogenic |
| 316 | 7   | F | Peru                    | No  | Panel       | <i>PIK3CD (GOF)</i>   | c.3061G>A                | p.Glu1021Lys       | heterozygous | missense    | 24.7 | Pathogenic |
| 317 |     | F | Peru                    | No  | WES         | <i>PIK3CD (GOF)</i>   | c.3061G>A                | p.Glu1021Lys       | heterozygous | missense    | 24.7 | Pathogenic |
| 318 | 4   | F | Peru                    | No  | Panel       | <i>PIK3CD (GOF)</i>   | c.3061G>A                | p.Glu1021Lys       | heterozygous | missense    | 24.7 | Pathogenic |
| 319 | 11  | M | Egypt                   | No  | Panel       | <i>PIK3CD (GOF)</i>   | c.3061G>A                | p.Glu1021Lys       | heterozygous | missense    | 24.7 | Pathogenic |
| 320 | 6   | M | Peru                    | No  | Panel       | <i>PIK3CD (GOF)</i>   | c.3061G>A                | p.Glu1021Lys       | heterozygous | missense    | 24.7 | Pathogenic |
| 321 | 5   | F | Iran                    | Yes | Panel       | <i>PIK3R1 (APDS2)</i> | c.1425+1G>A              | N/A                | heterozygous | splice site | .    | Pathogenic |
| 322 | 2   | M | Egypt                   | Yes | Panel       | <i>PNP</i>            | c.88delA                 | p.Ile30fs          | homozygous   | frameshift  | .    | Pathogenic |
| 323 | 1   | F | Egypt                   | Yes | Panel       | <i>PNP</i>            | c.349G>A                 | p.Ala117Thr        | homozygous   | missense    | 29.7 | Pathogenic |
| 324 | 4   | M | Turkey                  | Yes | Panel       | <i>PNP</i>            | c.200G>C                 | p.Arg67Pro         | homozygous   | missense    | 25.0 | Pathogenic |

|     |     |   |               |     |       |                |                   |               |              |             |      |            |
|-----|-----|---|---------------|-----|-------|----------------|-------------------|---------------|--------------|-------------|------|------------|
| 325 | 10  | M | Iran          | Yes | Panel | <i>PRKCD</i>   | c.1293_1294insA   | p.Gly432fs    | homozygous   | frameshift  | .    | Pathogenic |
| 326 | 16  | F | Egypt         | No  | Panel | <i>PSTPIP1</i> | c.850C>T          | p.Gln284Ter   | heterozygous | nonsense    | .    | Pathogenic |
| 327 | 0.3 | F | Iran          | Yes | Panel | <i>PTPRC</i>   | c.2848_2849insT   | p.Arg950Metfs | homozygous   | frameshift  | .    | Pathogenic |
| 328 | 23  | M | Lebanon       | Yes | Panel | <i>RAB27A</i>  | c.244C>T          | p.Arg82Cys    | homozygous   | missense    | 32.0 | Pathogenic |
| 329 | 0.8 | M | Kazakhstan    | Yes | Panel | <i>RAG1</i>    | c.2210G>A         | p.Arg737His   | heterozygous | missense    | 31.0 | Pathogenic |
| 330 | 2   | F | Egypt         | Yes | Panel | <i>RAG1</i>    | c.2918G>A         | p.Arg973His   | homozygous   | missense    | 29.6 | VUS        |
| 331 | 2   | F | Egypt         | Yes | Panel | <i>RAG1</i>    | c.1277_1279delAAG | p.Glu425del   | homozygous   | nonsense    | .    | Pathogenic |
| 332 | 1   | F | Egypt         | Yes | Panel | <i>RAG1</i>    | c.2867T>C         | p.Ile956Thr   | homozygous   | missense    | 25.1 | VUS        |
| 333 | 1   | M | Egypt         | Yes | Panel | <i>RAG1</i>    | c.2521C>T         | p.Arg841Trp   | homozygous   | missense    | 28.7 | Pathogenic |
| 334 | 0.5 | F | Egypt         | Yes | Panel | <i>RAG1</i>    | c.2923C>T         | p.Arg975Trp   | homozygous   | missense    | 28.2 | Pathogenic |
| 335 | 1   | F | Iran          | Yes | Panel | <i>RAG1</i>    | c.1180C>T         | p.Arg394Trp   | homozygous   | missense    | 28.5 | Pathogenic |
| 336 | 0.5 | M | Iran          | Yes | Panel | <i>RAG1</i>    | c.2570C>A         | p.Ala857Asp   | homozygous   | missense    | 28.3 | Pathogenic |
| 337 | 0.6 | F | Iran          | Yes | Panel | <i>RAG1</i>    | c.2985G>A         | p.Trp995Ter   | homozygous   | nonsense    | .    | Pathogenic |
| 338 | 1   | F | Iran          | Yes | Panel | <i>RAG1</i>    | c.322C>T          | p.Arg108Ter   | compound het | nonsense    | .    | Pathogenic |
|     |     |   |               |     |       |                | c.1405G>C         | p.Val469Leu   |              | missense    | 25.8 | Pathogenic |
| 339 | 0.4 | F | Iran          | Yes | Panel | <i>RAG1</i>    | c.1180C>T         | p.Arg394Trp   | homozygous   | missense    | 28.5 | Pathogenic |
| 340 | 0.4 | M | Iran          | Yes | Panel | <i>RAG1</i>    | c.2917C>T         | p.Arg973Cys   | homozygous   | missense    | 31.0 | VUS        |
| 341 | 0.3 | F | Lebanon       | No  | Panel | <i>RAG1</i>    | c.1210C>T         | p.Arg404Trp   | compound het | missense    | 26.9 | Pathogenic |
|     |     |   |               |     |       |                | c.2210G>A         | p.Arg737His   |              | missense    | 31.0 | Pathogenic |
| 342 | 0.6 | M | Pakistan      | Yes | Panel | <i>RAG1</i>    | c.2275C>T         | p.Arg759Cys   | homozygous   | missense    | 32.0 | VUS        |
| 343 | 0.2 | F | Pakistan      | Yes | Panel | <i>RAG1</i>    | c.2210G>A         | p.Arg737His   | homozygous   | missense    | 31.0 | Pathogenic |
| 344 | 9   | M | Peru          | No  | Panel | <i>RAG1</i>    | c.1685A>G         | p.Tyr562Cys   | compound het | missense    | 28.7 | VUS        |
|     |     |   |               |     |       |                | c.2522G>A         | p.Arg841Gln   |              | missense    | 33.0 | VUS        |
| 345 | 0.6 | F | Turkey        | Yes | Panel | <i>RAG1</i>    | c.937T>A          | p.Cys313Ser   | homozygous   | missense    | 24.2 | VUS        |
| 346 | 0.3 | F | Turkey        | Yes | Panel | <i>RAG1</i>    | c.1767C>G         | p.Tyr589Ter   | homozygous   | nonsense    | .    | Pathogenic |
| 347 | 0.3 | M | Turkey        | Yes | Panel | <i>RAG1</i>    | c.1378G>T         | p.Gly460Ter   | homozygous   | nonsense    | .    | Pathogenic |
| 348 | 10  | M | Kuwait        | Yes | WES   | <i>RAG1</i>    | c.1211G>A         | p.Arg404Gln   | homozygous   | missense    | 29.2 | VUS        |
| 349 | 0.5 | M | Lebanon       | Yes | Panel | <i>RAG1</i>    | c.987delC         | p.Ser330fs    | homozygous   | frameshift  | .    | Pathogenic |
| 350 | 10  | F | United States | No  | WES   | <i>RAG1</i>    | c.1420C>T         | p.Arg474Cys   | compound het | missense    | 28.7 | Pathogenic |
|     |     |   |               |     |       |                | c.2521C>T         | p.Arg841Trp   |              | missense    | 28.1 | Pathogenic |
| 351 | 6   | M | Algeria       | Yes | Panel | <i>RAG2</i>    | c.1340C>G         | p.Ser447Cys   | homozygous   | missense    | 27.4 | VUS        |
| 352 | 0.8 | F | Algeria       | Yes | Panel | <i>RAG2</i>    | c.104G>T          | p.Gly35Val    | homozygous   | missense    | 24.4 | Pathogenic |
| 353 | 0.2 | M | Egypt         | Yes | Panel | <i>RAG2</i>    | c.650A>G          | p.Tyr217Cys   | homozygous   | missense    | 25.8 | VUS        |
| 354 | 9   | M | Egypt         | Yes | Panel | <i>RAG2</i>    | c.104G>T          | p.Gly35Val    | homozygous   | missense    | 24.4 | Pathogenic |
| 355 | 2   | F | Iran          | Yes | Panel | <i>RAG2</i>    | c.734C>T          | p.Pro245Leu   | homozygous   | missense    | 27.6 | VUS        |
| 356 | 0.5 | M | Iran          | Yes | Panel | <i>RAG2</i>    | c.685C>T          | p.Arg229Trp   | homozygous   | missense    | 28.2 | VUS        |
| 357 | 0.4 | F | Iran          | Yes | Panel | <i>RAG2</i>    | c.130G>A          | p.Gly44Arg    | homozygous   | missense    | 25.7 | Pathogenic |
| 358 | 0.3 | M | Iran          | Yes | Panel | <i>RAG2</i>    | c.130G>A          | p.Gly44Arg    | homozygous   | missense    | 25.7 | Pathogenic |
| 359 | 0.5 | F | Jordan        | Yes | Panel | <i>RAG2</i>    | c.104G>T          | p.Gly35Val    | homozygous   | missense    | 24.4 | Pathogenic |
| 360 | 0.8 | M | Jordan        | Yes | Panel | <i>RAG2</i>    | c.104G>T          | p.Gly35Val    | homozygous   | missense    | 24.4 | Pathogenic |
| 361 | 12  | F | Kuwait        | Yes | Panel | <i>RAG2</i>    | c.104G>C          | p.Gly35Ala    | homozygous   | missense    | 24.1 | VUS        |
| 362 | 0.3 | M | Pakistan      | Yes | Panel | <i>RAG2</i>    | c.1247G>T         | p.Trp416Leu   | homozygous   | missense    | 29.1 | Pathogenic |
| 363 | 0.3 | F | Egypt         | Yes | Panel | <i>RAG2</i>    | c.644C>T          | p.Thr215Ile   | homozygous   | missense    | 22.8 | Pathogenic |
| 364 | 0.5 | M | Iran          | Yes | Panel | <i>RAG2</i>    | c.358delG         | p.Val120Leufs | homozygous   | frameshift  | .    | Pathogenic |
| 365 | 0.3 | M | Jordan        | Yes | Panel | <i>RAG2</i>    | c.104G>T          | p.Gly35Val    | homozygous   | missense    | 24.4 | Pathogenic |
| 366 | 46  | F | Algeria       | Yes | Panel | <i>RECQL4</i>  | c.2269C>T         | p.Gln757Ter   | compound het | nonsense    | .    | Pathogenic |
|     |     |   |               |     |       |                | c.3268G>A         | p.Glu1090Lys  |              | missense    | 26.8 | Pathogenic |
| 367 | 1   | M | Egypt         | Yes | Panel | <i>RFX5</i>    | c.715C>T          | p.Arg239Ter   | homozygous   | nonsense    | .    | Pathogenic |
| 368 | 0.4 | F | Jordan        | Yes | Panel | <i>RFX5</i>    | c.445C>T          | p.Arg149Ter   | homozygous   | nonsense    | .    | Pathogenic |
| 369 | 0.3 | M | Jordan        | Yes | Panel | <i>RFX5</i>    | c.445C>T          | p.Arg149Ter   | homozygous   | nonsense    | .    | Pathogenic |
| 370 | 0.6 | F | Jordan        | Yes | Panel | <i>RFX5</i>    | c.445C>T          | p.Arg149Ter   | homozygous   | nonsense    | .    | Pathogenic |
| 371 | 0.2 | M | Jordan        | Yes | Panel | <i>RFX5</i>    | c.445C>T          | p.Arg149Ter   | homozygous   | nonsense    | .    | Pathogenic |
| 372 | 0.4 | F | Jordan        | Yes | Panel | <i>RFX5</i>    | c.445C>T          | p.Arg149Ter   | homozygous   | nonsense    | .    | Pathogenic |
| 373 | 17  | M | Lebanon       | Yes | Panel | <i>RFX5</i>    | c.1801dupC        | p.Gln601fs    | homozygous   | frameshift  | .    | Pathogenic |
| 374 | 0.9 | M | Jordan        | Yes | Panel | <i>RFX5</i>    | c.715C>T          | p.Arg239Ter   | homozygous   | nonsense    | .    | Pathogenic |
| 375 | 2   | F | Egypt         | Yes | Panel | <i>RFXANK</i>  | c.713-2A>G        | N/A           | homozygous   | splice site | .    | Pathogenic |
| 376 | 0.3 | M | Iran          | Yes | Panel | <i>RFXANK</i>  | c.162delG         | p.Asp55fs     | homozygous   | frameshift  | .    | Pathogenic |

|     |     |   |               |     |             |                    |                 |                |              |             |      |            |
|-----|-----|---|---------------|-----|-------------|--------------------|-----------------|----------------|--------------|-------------|------|------------|
| 377 | 1   | M | Algeria       | Yes | Panel       | <i>RFXANK</i>      | c.673insC       | p.Met227Aspfs  | homozygous   | frameshift  | .    | Pathogenic |
| 378 | 0.6 | M | Iran          | Yes | Panel       | <i>RFXANK</i>      | c.634C>T        | p.Arg212Ter    | homozygous   | nonsense    | .    | Pathogenic |
| 379 | 9   | F | Iran          | Yes | Panel       | <i>RFXANK</i>      | c.163delA       | p.Asp55fs      | homozygous   | frameshift  | .    | Pathogenic |
| 380 | 0.6 | F | Iran          | Yes | Panel       | <i>RFXAP</i>       | c.467delA       | p.Gln156Argfs  | homozygous   | frameshift  | .    | Pathogenic |
| 381 | 5   | M | Algeria       | Yes | Panel + WES | <i>RIPK1</i>       | c.1835T>C       | p.Ile612Thr    | homozygous   | missense    | 27.4 | VUS        |
| 382 | 4   | M | Egypt         | Yes | Panel       | <i>RMRP</i>        | g.9:35657888C>G | N/A            | homozygous   | missense    | 11.1 | Pathogenic |
| 383 | 1   | M | Algeria       | Yes | Panel       | <i>RMRP</i>        | g.9:35657917G>T | N/A            | homozygous   | missense    | 17.9 | Pathogenic |
| 384 | 8   | M | Argentina     | Yes | Panel       | <i>SBDS</i>        | c.258+2T>C      | N/A            | homozygous   | splice site | .    | Pathogenic |
| 385 | 26  | F | Argentina     | Yes | Panel       | <i>SBDS</i>        | c.258+2T>C      | N/A            | homozygous   | splice site | .    | Pathogenic |
| 386 | 6   | M | Egypt         | No  | Panel       | <i>SH2D1A</i>      | c.32T>G         | p.Ile11Ser     | hemizygous   | missense    | 24.6 | VUS        |
| 387 | 1   | M | Egypt         | No  | Panel       | <i>SH2D1A</i>      | c.295C>T        | p.Gln99Ter     | hemizygous   | nonsense    | .    | Pathogenic |
| 388 | 7   | M | Peru          | No  | Panel       | <i>SH2D1A</i>      | c.251T>G        | p.Ile84Ser     | hemizygous   | missense    | 32.0 | Pathogenic |
| 389 | 6   | F | Lebanon       | Yes | Panel + WES | <i>SLC39A7</i>     | c.469C>G        | p.Pro157Ala    | homozygous   | missense    | 25.5 | VUS        |
| 390 | 0.5 | F | Pakistan      | Yes | Panel + WES | <i>SLC7A7</i>      | del exons 6-11  | del exons 6-11 | homozygous   | deletion    | .    | Pathogenic |
| 391 | 5   | M | Egypt         | Yes | WES         | <i>SLC7A7</i>      | c.404delT       | p.I135fs       | homozygous   | frameshift  | .    | Pathogenic |
| 392 | 5   | M | Iran          | Yes | Panel       | <i>SMARCAL1</i>    | del exons 1-2   | del exons 1-2  | homozygous   | deletion    | .    | Pathogenic |
| 393 | 0.5 | F | Lebanon       | Yes | Panel       | <i>SP110</i>       | c.642delC       | p.Ser215Alafs  | homozygous   | frameshift  | .    | Pathogenic |
| 394 | 1   | M | Lebanon       | Yes | Panel       | <i>SP110</i>       | c.642_642delC   | p.Ser215fs     | homozygous   | frameshift  | .    | Pathogenic |
| 395 | 5   | M | Oman          | Yes | Panel       | <i>SP110</i>       | c.55C>T         | p.Gln19Ter     | homozygous   | nonsense    | .    | Pathogenic |
| 396 | 7   | M | Saudi Arabia  | Yes | Panel       | <i>STAT1 (GOF)</i> | c.1066T>G       | p.Tyr356Asp    | heterozygous | missense    | 23.3 | VUS        |
| 397 | 10  | F | Peru          | No  | Panel       | <i>STAT1 (GOF)</i> | c.1154C>T       | p.Thr385Met    | heterozygous | missense    | 26.5 | Pathogenic |
| 398 | 24  | M | Italy         | No  | Panel       | <i>STAT1 (GOF)</i> | c.890delA       | p.Asn297fs     | heterozygous | frameshift  | .    | Pathogenic |
| 399 | 2   | F | Algeria       | No  | Panel       | <i>STAT1 (GOF)</i> | c.1154C>T       | p.Thr385Met    | heterozygous | missense    | 26.5 | Pathogenic |
| 400 | 15  | F | United States | No  | Panel       | <i>STAT1 (GOF)</i> | c.1213C>T       | p.Arg405Trp    | heterozygous | missense    | 32.0 | Pathogenic |
| 401 | 1   | M | Egypt         | Yes | Panel       | <i>STAT1 (GOF)</i> | c.537C>A        | p.Asn179Lys    | heterozygous | missense    | 22.0 | Pathogenic |
| 402 | 0.7 | M | Egypt         | No  | Panel       | <i>STAT1 (GOF)</i> | c.1031A>C       | p.Lys344Thr    | heterozygous | missense    | 27.4 | Pathogenic |
| 403 | 1   | M | Egypt         | Yes | Panel       | <i>STAT1 (LOF)</i> | c.1652dupA      | p.Asn551Lysfs  | homozygous   | frameshift  | .    | Pathogenic |
| 404 | 1   | F | Egypt         | No  | Panel       | <i>STAT1 (GOF)</i> | c.1154C>T       | p.Thr385Met    | heterozygous | missense    | 26.5 | Pathogenic |
| 405 | 3   | M | Mexico        | No  | Panel       | <i>STAT1 (GOF)</i> | c.972C>G        | p.Cys324Trp    | heterozygous | missense    | 28.3 | Pathogenic |
| 406 | 39  | M | Oman          | No  | Panel       | <i>STAT1 (GOF)</i> | c.820C>T        | p.Arg274Trp    | heterozygous | missense    | 32.0 | Pathogenic |
| 407 | 10  | F | Peru          | No  | Panel       | <i>STAT1 (GOF)</i> | c.1154C>T       | p.Thr385Met    | heterozygous | missense    | 26.5 | Pathogenic |
| 408 | 9   | M | Peru          | Yes | Panel       | <i>STAT1 (GOF)</i> | c.511G>A        | p.Asp171Asn    | heterozygous | missense    | 31.0 | Pathogenic |
| 409 | 4   | F | Peru          | No  | Panel       | <i>STAT1 (GOF)</i> | c.1154C>T       | p.Thr385Met    | heterozygous | missense    | 26.5 | Pathogenic |
| 410 | 12  | M | Peru          | No  | Panel       | <i>STAT1 (GOF)</i> | c.1219C>G       | p.Leu407Val    | heterozygous | missense    | 25.4 | VUS        |
| 411 | 0.9 | F | Peru          | No  | Panel       | <i>TNFRSF13B</i>   | c.832delG       | p.Gly278Alafs  | homozygous   | frameshift  | .    | Pathogenic |
|     |     |   |               |     |             | <i>STAT1 (GOF)</i> | c.1154C>T       | p.Thr385Met    | heterozygous | missense    | 26.5 | Pathogenic |
| 412 | 15  | F | Lebanon       | No  | Panel       | <i>STAT1 (GOF)</i> | c.821G>A        | p.Arg274Gln    | heterozygous | missense    | 28.5 | Pathogenic |
| 413 | 2   | M | Saudi Arabia  | No  | Panel       | <i>STAT1 (LOF)</i> | del exons 3-4   | del exons 3-4  | homozygous   | deletion    | .    | Pathogenic |
| 414 | 4   | F | Greece        | No  | Panel       | <i>STAT1 (GOF)</i> | c.800C>T        | p.Ala267Val    | heterozygous | missense    | 24.7 | Pathogenic |
| 415 | 11  | F | United States | No  | Panel       | <i>STAT3 (GOF)</i> | c.519T>G        | p.Asp173Glu    | heterozygous | missense    | 23.4 | VUS        |
| 416 | 7   | M | Chile         | No  | Panel       | <i>STAT3 (LOF)</i> | c.1771A>G       | p.Lys591Glu    | heterozygous | missense    | 25.0 | Pathogenic |
| 417 | 7   | M | Egypt         | No  | Panel       | <i>STAT3 (GOF)</i> | c.2117T>C       | p.Leu706Pro    | heterozygous | missense    | 32.0 | Pathogenic |
| 418 | 5   | F | Egypt         | Yes | Panel       | <i>STAT3 (LOF)</i> | c.1268G>A       | p.Arg423Gln    | heterozygous | missense    | 33.0 | Pathogenic |
| 419 | 1   | M | Egypt         | No  | Panel       | <i>STAT3 (LOF)</i> | c.1909G>A       | p.Val637Met    | heterozygous | missense    | 23.6 | Pathogenic |
| 420 | 11  | F | Iran          | No  | Panel       | <i>STAT3 (LOF)</i> | c.1144C>T       | p.Arg382Trp    | heterozygous | missense    | 32.0 | Pathogenic |
| 421 | 8   | F | Kazakhstan    | No  | Panel       | <i>STAT3 (GOF)</i> | c.2144C>T       | p.Pro715Leu    | heterozygous | missense    | 33.0 | Pathogenic |
| 422 | 2   | F | Oman          | Yes | Panel       | <i>STAT3 (LOF)</i> | c.1144C>T       | p.Arg382Trp    | heterozygous | missense    | 32.0 | Pathogenic |
| 423 | 3   | M | Oman          | Yes | Panel       | <i>STAT3 (LOF)</i> | c.2132T>C       | p.Ile711Thr    | heterozygous | missense    | 28.6 | Pathogenic |
| 424 | 9   | F | Peru          | No  | Panel       | <i>STAT3 (LOF)</i> | c.1144C>T       | p.Arg382Trp    | heterozygous | missense    | 32.0 | Pathogenic |
| 425 | 3   | F | Peru          | Yes | Panel       | <i>STAT3 (LOF)</i> | c.1145G>A       | p.Arg382Gln    | heterozygous | missense    | 33.0 | Pathogenic |
| 426 | 24  | M | Peru          | No  | Panel       | <i>STAT3 (LOF)</i> | c.1913A>G       | p.Glu638Gly    | heterozygous | missense    | 27.6 | VUS        |
| 427 | 13  | M | Peru          | No  | Panel       | <i>STAT3 (LOF)</i> | c.1144C>T       | p.Arg382Trp    | heterozygous | missense    | 32.0 | Pathogenic |
| 428 | 8   | F | Turkey        | No  | WES         | <i>STAT3 (LOF)</i> | c.992T>G        | p.Met331Arg    | heterozygous | missense    | 26.3 | Pathogenic |
| 429 | 13  | M | Argentina     | No  | Panel       | <i>STAT3 (LOF)</i> | c.551-1G>C      | N/A            | heterozygous | splice site | .    | Pathogenic |
| 430 | 0.3 | F | Lebanon       | Yes | Panel       | <i>STAT5B</i>      | c.1101_1102insA | p.Gln368Thrfs  | homozygous   | frameshift  | .    | Pathogenic |
| 432 | 7   | M | Egypt         | No  | Panel       | <i>STK4</i>        | del exons 4-8   | del exons 4-8  | homozygous   | deletion    | .    | Pathogenic |
| 431 | 2   | M | Egypt         | Yes | Panel       | <i>STK4</i>        | c.442C>T        | p.Arg148Ter    | homozygous   | nonsense    | .    | Pathogenic |



|     |     |   |               |     |             |                                      |                                 |                               |                              |                          |      |            |
|-----|-----|---|---------------|-----|-------------|--------------------------------------|---------------------------------|-------------------------------|------------------------------|--------------------------|------|------------|
| 433 | 14  | F | Egypt         | Yes | Panel       | <i>STK4</i>                          | c.1A>T                          | p. Met1Leu                    | homozygous                   | missense                 | 23.7 | Pathogenic |
| 434 | 14  | M | Egypt         | Yes | Panel       | <i>STK4</i>                          | c.722delC                       | p.Pro241Leufs                 | homozygous                   | frameshift               | .    | Pathogenic |
| 435 | 10  | F | Turkey        | Yes | Panel       | <i>TAP1</i>                          | c.2143C>T                       | p.Arg715Ter                   | homozygous                   | nonsense                 | .    | Pathogenic |
| 436 | 8   | F | Pakistan      | Yes | Panel       | <i>TCF3</i>                          | del exons 5-11                  | del exons 5-11                | homozygous                   | deletion                 | .    | Pathogenic |
| 437 | 0.3 | M | Oman          | Yes | Panel + WES | <i>TCN2</i>                          | c.924_927delCTGT                | p.Cys309Trpfs                 | homozygous                   | frameshift               | .    | Pathogenic |
| 438 | 3   | F | Egypt         | No  | Panel       | <i>TERT</i>                          | del exon 5                      | del exon 5                    | homozygous                   | deletion                 | .    | Pathogenic |
| 439 | 33  | M | Algeria       | No  | Panel       | <i>TNFRSF13B</i>                     | c.204dupA                       | p.Leu69Thrfs                  | heterozygous                 | frameshift               | .    | Pathogenic |
| 440 | 16  | M | Turkey        | Yes | Panel       | <i>TNFRSF13B</i><br><i>TNFRSF13B</i> | c.204dupA<br>c.834delC          | p.Leu69Thrfs<br>p.Gly280Alafs | heterozygous<br>heterozygous | frameshift<br>frameshift | .    | Pathogenic |
| 441 | 2   | M | Egypt         | Yes | Panel       | <i>TRNT1</i>                         | c.947_948insG                   | p.Glu318fs                    | homozygous                   | frameshift               | .    | Pathogenic |
| 442 | 0.6 | F | United States | No  | Panel       | <i>TTC7A</i><br><i>TTC7A</i>         | c.211G>A<br>c.911delT           | p.Glu71Lys<br>p.Leu304Argfs   | compound het                 | missense<br>frameshift   | 29.8 | Pathogenic |
| 443 | 8   | F | Iran          | Yes | Panel       | <i>TYK2</i>                          | del exons 8-25                  | del exons 8-25                | homozygous                   | deletion                 | .    | Pathogenic |
| 444 | 0.6 | M | Iran          | Yes | Panel       | <i>UNC13D</i>                        | c.1208T>C                       | p.Leu403Pro                   | homozygous                   | missense                 | 25.1 | Pathogenic |
| 445 | 21  | M | Egypt         | No  | Panel       | <i>UNC13D</i><br><i>UNC13D</i>       | c.2942_2945dupAGAC<br>c.1193C>T | p.Phe983Aspfs<br>p.Ser398Leu  | compound het                 | frameshift<br>missense   | .    | Pathogenic |
| 446 | 8   | M | Egypt         | Yes | Panel       | <i>UNC13D</i>                        | c.2215_2239del                  | p.Asn739_Alafs                | homozygous                   | frameshift               | .    | Pathogenic |
| 447 | 0.5 | M | Lebanon       | Yes | Panel       | <i>UNC13D</i>                        | c.627delT                       | p.Val210Trpfs                 | homozygous                   | frameshift               | .    | Pathogenic |
| 448 | 6   | M | Egypt         | No  | Panel       | <i>WAS</i>                           | c.274-2A>G                      | N/A                           | hemizygous                   | splice site              | .    | Pathogenic |
| 449 | 0.2 | M | Peru          | No  | Panel       | <i>WAS</i>                           | c.172delC                       | p.Pro59fs                     | hemizygous                   | frameshift               | .    | Pathogenic |
| 450 | 7   | M | Egypt         | Yes | Panel       | <i>WAS</i>                           | c.289T>A                        | p.Trp97Arg                    | hemizygous                   | missense                 | 29.7 | Pathogenic |
| 451 | 1   | M | Egypt         | No  | Panel       | <i>WAS</i>                           | del exons 10-12                 | del exons 10-12               | hemizygous                   | deletion                 | .    | Pathogenic |
| 452 | 4   | M | Egypt         | No  | Panel       | <i>WAS</i>                           | c.91G>A                         | p.Glu31Lys                    | hemizygous                   | missense                 | 25.9 | Pathogenic |
| 453 | 1   | M | Egypt         | Yes | Panel       | <i>WAS</i>                           | c.176_188delCTGGAGCTGAGCA       | p.Ala61fs                     | hemizygous                   | frameshift               | .    | Pathogenic |
| 454 | 1   | M | Iran          | Yes | Panel       | <i>WAS</i>                           | c.687delG                       | p.Lys230fs                    | hemizygous                   | frameshift               | .    | Pathogenic |
| 455 | 0.8 | M | Iran          | Yes | Panel       | <i>WAS</i>                           | c.777+1G>C                      | N/A                           | hemizygous                   | splice site              | .    | Pathogenic |
| 456 | 0.5 | M | Iran          | No  | Panel       | <i>WAS</i>                           | c.397G>A                        | p.Glu133Lys                   | hemizygous                   | missense                 | 27.7 | Pathogenic |
| 457 | 4   | M | Jordan        | No  | Panel       | <i>WAS</i>                           | c.121C>T                        | p.Arg41Ter                    | hemizygous                   | nonsense                 | .    | Pathogenic |
| 458 | 4   | M | Jordan        | No  | Panel       | <i>WAS</i>                           | c.121C>T                        | p.Arg41Ter                    | hemizygous                   | nonsense                 | .    | Pathogenic |
| 459 | 2   | M | Pakistan      | No  | Panel       | <i>WAS</i>                           | c.280_280delC                   | p.Arg94fs                     | hemizygous                   | frameshift               | .    | Pathogenic |
| 460 | 1   | M | Egypt         | No  | Panel       | <i>WAS</i>                           | c.1210_1211insCG                | p.Ser405Profs                 | hemizygous                   | frameshift               | .    | Pathogenic |
| 461 | 1   | M | Greece        | Yes | Panel       | <i>WAS</i>                           | c.764delA                       | p. Gln255fs                   | hemizygous                   | frameshift               | .    | Pathogenic |
| 462 | 0.4 | M | Peru          | Yes | Panel       | <i>WAS</i>                           | c.361_361+1insG                 | N/A                           | hemizygous                   | splice site              | .    | Pathogenic |
| 463 | 4   | M | Egypt         | No  | Panel       | <i>WAS</i>                           | c.177delT                       | p.Gly60fs                     | hemizygous                   | frameshift               | .    | Pathogenic |
| 464 | 0.5 | M | Greece        | No  | Panel       | <i>WAS</i>                           | c.70T>C                         | p.Ser24Pro                    | hemizygous                   | missense                 | 24.3 | Pathogenic |
| 465 | 8   | M | Greece        | No  | Panel       | <i>XIAP</i>                          | c.1336G>T                       | p.Glu446Ter                   | hemizygous                   | nonsense                 | .    | Pathogenic |
| 466 | 10  | M | Egypt         | Yes | Panel       | <i>XIAP</i>                          | del exons 3-4                   | del exons 3-4                 | hemizygous                   | deletion                 | .    | Pathogenic |
| 467 | 6   | M | Peru          | No  | Panel       | <i>XIAP</i>                          | del exons 2-3                   | del exons 2-3                 | hemizygous                   | deletion                 | .    | Pathogenic |
| 468 | 1   | F | Egypt         | Yes | Panel       | <i>ZAP70</i>                         | c.1799delT                      | p.Leu600Argfs                 | homozygous                   | nonsense                 | .    | Pathogenic |
| 469 | 1   | F | Egypt         | Yes | Panel       | <i>ZAP70</i>                         | c.261C>G                        | p.Tyr87Ter                    | homozygous                   | nonsense                 | .    | Pathogenic |
| 470 | 1   | M | Egypt         | Yes | Panel       | <i>ZAP70</i>                         | c.1780C>T                       | p.Arg594Ter                   | homozygous                   | nonsense                 | .    | Pathogenic |
| 471 | 1   | F | Pakistan      | Yes | Panel       | <i>ZBTB24</i>                        | c.396_397delTA                  | p.His132fs                    | homozygous                   | frameshift               | .    | Pathogenic |

\*Pathogenic = Pathogenic or Likely Pathogenic by Pathogenic criteria, VUS = variant of uncertain significance with features concordant with disease

\*\*patient had digenic mutations in IFNAR1 and IFNGR2. Details of IFNAR1 mutation in Supplementary Table 3
