# Supplementary material
Source: PubMed Central journal article supplement (PMC7870529)
Supplement: NIHMS1634931-supplement-6.pdf [file NIHMS1634931-supplement-6.pdf]

Supplementary Table 3: Variants in Novel Genes at the Time of Sequencing

| Proband Number | Age (years) | Sex | Country              | Consang. | NGS Technology | Gene            | Mutation Type          | cDNA             | AA             | Zygoty       | Reference |
|----------------|-------------|-----|----------------------|----------|----------------|-----------------|------------------------|------------------|----------------|--------------|-----------|
| 472            | 0.3         | M   | Lebanon              | Yes      | WES            | <i>DOCK2</i>    | frameshift             | c.3725_3726insTA | p.Y1242fs      | homozygous   | 1         |
| 473            | 2           | F   | Algeria              | Yes      | Panel + WES    | <i>FCHO1</i>    | frameshift             | c.184_185insC    | p.Met64Hisfs   | homozygous   | 2         |
| 474            | 6           | F   | Turkey               | Yes      | Panel + WES    | <i>FCHO1</i>    | splice site            | c.27+1G>A        | N/A            | homozygous   | 2         |
| 184*           | 0.3         | M   | Saudi Arabia         | Yes      | WES            | <i>IFNAR1</i>   | deletion of stop codon | c.1671_1821del   | p.557Gluext*46 | homozygous   | 3         |
| 476            | 6           | F   | Egypt                | Yes      | Panel + WES    | <i>ITPKB</i>    | frameshift             | c.2583delT       | p.Arg862Glufs  | homozygous   | 4         |
| 477            | 13          | F   | Lebanon              | Yes      | WES            | <i>MALT1</i>    | missense               | c.266G>T         | p.Ser89Ile     | homozygous   | 5         |
| 478            | 1           | M   | Kuwait               | Yes      | WES            | <i>NEIL3</i>    | insertion              | c.395_396AC>TG   | p.Asp132Val    | homozygous   | 6         |
| 479            | 6           | M   | Pakistan             | Yes      | WES            | <i>PIK3CD**</i> | frameshift             | c.2558_2559      | p.Asp853Glyfs  | homozygous   | 7         |
| 480            | 39          | M   | Italy                | No       | Panel + WES    | <i>RAC2***</i>  | missense               | c.101C>A         | p.Pro34His     | heterozygous | 8         |
| 481            | 6           | M   | Kuwait               | Yes      | Panel + WES    | <i>REL</i>      | splice site            | c.535+1G>A       | N/A            | homozygous   | 9         |
| 482            | 5           | F   | United States        | No       | WES            | <i>RELA</i>     | splice site            | c.550+1G>A       | N/A            | heterozygous | 10        |
| 483            | 5           | M   | Saudi Arabia         | Yes      | WES            | <i>TFRC</i>     | missense               | c.58T>C          | p.Tyr20His     | homozygous   | 11        |
| 484            | 9           | M   | Kuwait               | Yes      | WGS            | <i>TFRC</i>     | missense               | c.58T>C          | p.Tyr20His     | homozygous   | 11        |
| 485            | 12          | M   | United Arab Emirates | Yes      | WES            | <i>TNFSF9</i>   | missense               | c.466 G>A        | p.Glu156Lys    | homozygous   | 12        |
| 486            | 1           | F   | Turkey               | Yes      | Panel + WES    | <i>WDR1</i>     | missense               | c.1070A>T        | p.Asp357Val    | homozygous   | #         |
| 487            | 0.3         | M   | Kuwait               | Yes      | WES            | <i>WDR1</i>     | missense               | c.491C>T         | p.Thr164Met    | homozygous   | #         |

\*patient had digenic mutations in *IFNAR1* and *IFNGR2*. Details of *IFNGR2* mutation in Table S2

\*\* loss of function mutation

\*\*\*gain of function mutation

# novel gene at time of sequencing, though subsequently published by other groups
